# Supplementary material for: Whole Genome Sequencing for Determining the Source of Mycobacterium bovis Infections in Livestock Herds and Wildlife in New Zealand
Source: Front Vet Sci. 2018 Oct 30;5:272. doi: 10.3389/fvets.2018.00272 (PMC6218598; doi:10.3389/fvets.2018.00272)
Supplement: Supplementary File 1 — SNPs excluded from the analysis. Numbers indicate regions or individual positions in UK reference version NC_002945.3 for which SNPs were excluded from all isolates. [file Table_1.XLSX]

## Sheet: regions excluded
start	end
80272	80587	315	Rep'-1
103748	105252	1504	Rep-2, rep251
131420	132911	1491	PE-PGRS-1
149571	151188	1617	PE-PGRS-2
331762	340104	8342	PE_PGRS3ab,4
362336	364156	1820	PE_PGRS5
476835	477203	368	hyp code seq
607657	609211	1554	hyp code seq poor coverage deletion
623943	625822	1879	PE_PGRS6a, PE_PGRS6b
632347	633827	1480	hyp code seq poor coverage
672899	673017	118	TB27.3 CDS
673239	677160	3921	PE_PGRS7
743745	744229	484	intergenic region
834814	835408	594	PE_PGRS8
837525	839919	2394	PE_PGRS9
840317	843047	2730	PE_PGRS10
848349	850104	1755	PE_PGRS11
925781	928513	2732	PE_PGRS12,13
928739	931235	2496	PE_PGRS14
965012	966253	1241	rpfA and 3' region
968884	970711	1827	PE_PGRS15
1025924	1027360	1436	IS1554
1027507	1029829	2322	IS1535
1090812	1093584	2772	PE_PGRS16
1093800	1094808	1008	PE_PGRS17
1095529	1096903	1374	PE_PGRS18
1096903	1097130	227	3' of PGRS18 poorly covered
1121092	1122600	1508	hyp code seq
1165019	1165997	978	IS-like1 transposase
1169747	1171181	1434	IS1081 transposase
1188869	1190885	2016	PE_PGRS19
1191217	1193509	2292	PE_PGRS20
1212920	1215245	2325	PE_PGRS21
1217850	1220403	2553	PE_PGRS22
1252988	1254344	1356	repeat region 22G8
1277672	1279121	1449	repeat region 4
1279215	1280193	978	IS-like2
1342543	1343986	1443	IS 1801-2 transposase
1386233	1387922	1689	PE_PGRS22
1412656	1412810	154	pknH
1466189	1467688	1499	IS1557-2
1486189	1488001	1812	PE_PGRS24
1568806	1570165	1359	PE_PGRS22
1614537	1616013	1476	PE_PGRS26
1626985	1631212	4227	PE_PGRS27
1632588	1634976	2388	PE_PGRS28
1652355	1653468	1113	PE_PGRS29
1764556	1775565	11009	PhiRV1 phage
1847712	1850769	3057	PE_PGRS30
1912553	1913932	1379	repeat region I125
1980894	1982782	1888	wag22b
1987699	1990254	2555	hyp cds,ISB9'
1991054	1992929	1875	PE_PGRS31
2051633	2053139	1506	PE_PGRS33
2078323	2079724	1401	PE_PGRS34
2187623	2188985	1362	REP 09F9
2205160	2206837	1677	PE_PGRS35
2278444	2291268	12824	pks12
2403758	2405230	1472	PE_PGRS38
2418238	2418982	744	IS1558
2595264	2596506	1242	PE_PGRS39
2619824	2620010	186	PE_PGRS40
2660871	2661954	1083	PE_PGRS41
2671958	2672058	100	intergenic region misalignments
2690027	2690040	13	inverted repeat
2688829	2690040	1211	transposon IS1558-2
2762102	2762927	825	PE_PGRS42b
2762605	2763778	1173	PE_PGRS42d
2769033	2772367	3334	PE_PGRS43b
2771504	2773033	1529	PE_PGRS43a
2795329	2796653	1324	IS 1081
2888999	2890640	1641	PE_PGRS44
2911057	2912452	1395	PE_PGRS45
2927567	2929904	2337	PE_PGRS46
2939498	2939513	15	inverted repeat
3010528	3012043	1515	PE_PGRS47
3075735	3075771	36	DR region
3075806	3075842	36	DR region
3075879	3075915	36	DR region
3075953	3075989	36	DR region
3076032	3076068	36	DR region
3076109	3076145	36	DR region
3076183	3076219	36	DR region
3076257	3076293	36	DR region
3076330	3076366	36	DR region
3076404	3076440	36	DR region
3076475	3076511	36	DR region
3076548	3076584	36	DR region
3076621	3076657	36	DR region
3076693	3076729	36	DR region
3076765	3076801	36	DR region
3076839	3076875	36	DR region
3076913	3076949	36	DR region
3076984	3077004	20	DR region
3077004	3077032	28	DR region
3078331	3078378	47	DR region
3078418	3078454	36	DR region
3078493	3078529	36	DR region
3078566	3078602	36	DR region
3078642	3078678	36	DR region
3078719	3078755	36	DR region
3078791	3078827	36	DR region
3078863	3078899	36	DR region
3078936	3078972	36	DR region
3078997	3079033	36	DR region
3079074	3079110	36	DR region
3079146	3079182	36	DR region
3079221	3079257	36	DR region
3079295	3079331	36	DR region
3079369	3079405	36	DR region
3079440	3079476	36	DR region
3079515	3079551	36	DR region
3079589	3079625	36	DR region
3079664	3079700	36	DR region
3079736	3079772	36	DR region
3079807	3079843	36	DR region
3079880	3079916	36	DR region
3079952	3079988	36	DR region
3080029	3080065	36	DR region
3101741	3104443	2702	infB
3118784	3120632	1848	PE_PGRS47
3244934	3247157	2223	IS1533 transposon
3290455	3292480	2025	IS1538
3332891	3339316	6425	esxQ, PPE46, esxR, esxS, PPE47, PE29, is1081-5
3430140	3430150	10	prfB
3437865	3439316	1451	IS1081-6
3483891	3484513	622	PPE53 and adjacent
3511796	3513186	1390	IS1603
3548940	3549000	60	intergenic DNS binding region
3669500	3670640	1140	IS1547-2 deleted in many
3686614	3690630	4016	PPE54-and PEPGRS 50a and b
3694693	3696308	1615	PE_PGRS50b,a
3686614	3696308	9694	PPE54
3732094	3733975	1881	PE_PGRS51
3752268	3753840	1572	IS 1560-2
3753936	3756186	2250	PE_PGRS52
3772545	3773200	655	hyp code seq intergenic poor cvge mismapping
3795435	3797844	2409	PPE57 and IS1540-2,IS1552
3840432	3841941	1509	PE31 and PPE60
3872192	3876275	4083	PE_PGRS53
3876565	3880948	4383	PE_PGRS54
3883854	3889671	5817	PE_PGRS55
3890501	3893480	2979	PE_PGRS57
3974619	3976374	1755	PE_PGRS58
3979813	3981292	1479	PE_PGRS59
4012903	4015021	2118	IS1534
4015743	4017036	1293	IS1553
4030207	4032550	2343	intergenic region PE PGRS60,PEPGRS 61
4189144	4190656	1512	IS1557-3
4254601	4255708	1107	IS1608-2
4481		1
8742		1
27725		1
28006		1
33789		1
53188		1
71245		1
79331		1
91753		1
127448		1
160536		1
162532		1
163508		1
165800		1
166697		1
182881		1
188876		1
215273		1
224047		1
232189		1
234630		1
242062		1
243655		1
258070		1
265676		1
290908		1
292119		1
324744		1
350762		1
368536		1
373002		1
402356		1
405887		1
416731		1
417909		1
427860		1
428253		1
430078		1
438483		1
441763		1
456771		1
466842		1
467344		1
467403		1
488898		1
498352		1
519413		1
547560		1
597414		1
598705		1
616759		1
626053		1
630357		1
644246		1
678292		1
685070		1
701330		1
701387		1
712320		1
724779		1
726980		1
757149		1
828004		1
831511		1
865822		1
870117		1
909042		1
910131		1
915687		1
941069		1
948023		1
948975		1
967990		1
976328		1
1036103		1
1109295		1
1137773		1
1139462		1
1168431		1
1188199		1
1199503		1
1206869		1
1211004		1
1252785		1
1259223		1
1284922		1
1285131		1
1288686		1
1335065		1
1337279		1
1341145		1
1341156		1
1341311		1
1412797		1
1412858		1
1424514		1
1431201		1
1451683		1
1471158		1
1476919		1
1497524		1
1506905		1
1507997		1
1528767		1
1530891		1
1530895		1
1530958		1
1530979		1
1530980		1
1530983		1
1530989		1
1530993		1
1530997		1
1531006		1
1531007		1
1531015		1
1531017		1
1531022		1
1531024		1
1531040		1
1531052		1
1531095		1
1531096		1
1531113		1
1531124		1
1531177		1
1531179		1
1531181		1
1531195		1
1531198		1
1531199		1
1531363		1
1534145		1
1567858		1
1572939		1
1605465		1
1662641		1
1693565		1
1710976		1
1722830		1
1737145		1
1758053		1
1764373		1
1785888		1
1798469		1
1798627		1
1812883		1
1865520		1
1872959		1
1873346		1
1882838		1
1888238		1
1896591		1
1911053		1
1937373		1
1937692		1
1941109		1
1947325		1
1953570		1
1968550		1
1968554		1
1968615		1
1973309		1
1980584		1
1982826		1
1997653		1
2002483		1
2017232		1
2019542		1
2020945		1
2021398		1
2023461		1
2023918		1
2026142		1
2031054		1
2034202		1
2042474		1
2043965		1
2044763		1
2053145		1
2055512		1
2073407		1
2080953		1
2094634		1
2132269		1
2141459		1
2153682		1
2153685		1
2153687		1
2153689		1
2153691		1
2153852		1
2154171		1
2154173		1
2154197		1
2156538		1
2156612		1
2156997		1
2158077		1
2158086		1
2159535		1
2195212		1
2200252		1
2240045		1
2241814		1
2248511		1
2253137		1
2329422		1
2329584		1
2335578		1
2373914		1
2390588		1
2393524		1
2401659		1
2408027		1
2409184		1
2413857		1
2423987		1
2434371		1
2459653		1
2471337		1
2492612		1
2509054		1
2509391		1
2511027		1
2511080		1
2516166		1
2520532		1
2525003		1
2528548		1
2532476		1
2548889		1
2569006		1
2570255		1
2585544		1
2604746		1
2604965		1
2607325		1
2652241		1
2663079		1
2668455		1
2692087		1
2705554		1
2725067		1
2743387		1
2754351		1
2769034		1
2803101		1
2805232		1
2831641		1
2833367		1
2833957		1
2834005		1
2834061		1
2834145		1
2834410		1
2866214		1
2868617		1
2881708		1
2882174		1
2888635		1
2892301		1
2895851		1
2896115		1
2898863		1
2912602		1
2920016		1
2920365		1
2922724		1
2938516		1
2950792		1
2955132		1
2956185		1
2964313		1
3005683		1
3036409		1
3040199		1
3040402		1
3047012		1
3049238		1
3061518		1
3063630		1
3066231		1
3067573		1
3068899		1
3076037		1
3076432		1
3078023		1
3078653		1
3089120		1
3089528		1
3089837		1
3092733		1
3093026		1
3096228		1
3096704		1
3098943		1
3100174		1
3112215		1
3113842		1
3133060		1
3169157		1
3189208		1
3189220		1
3189276		1
3189332		1
3191327		1
3210370		1
3222658		1
3225922		1
3242339		1
3248020		1
3293334		1
3293902		1
3343459		1
3392210		1
3413525		1
3417572		1
3460074		1
3460113		1
3478233		1
3486266		1
3491099		1
3493546		1
3543150		1
3553043		1
3554554		1
3554789		1
3563126		1
3614596		1
3622007		1
3640359		1
3641273		1
3662103		1
3663411		1
3666693		1
3692464		1
3694737		1
3707948		1
3711722		1
3715390		1
3719142		1
3720544		1
3720791		1
3724939		1
3740217		1
3774061		1
3800111		1
3801055		1
3806607		1
3812466		1
3816847		1
3826050		1
3831452		1
3832095		1
3832428		1
3832431		1
3832546		1
3832548		1
3832603		1
3832987		1
3835238		1
3909087		1
3929285		1
3935520		1
3938628		1
4006349		1
4023659		1
4048040		1
4052207		1
4072778		1
4080981		1
4094413		1
4096072		1
4112687		1
4126174		1
4126516		1
4160194		1
4161058		1
4209848		1
4210812		1
4214598		1
4233865		1
4243850		1
4248425		1
4270787		1
4284472		1
4289818		1
4292492		1
4299985		1
4305036		1
4305852		1
4309115		1
4324068		1
4325119		1
4334625		1
