# Supplementary material for: Whole Genome Sequencing for Determining the Source of Mycobacterium bovis Infections in Livestock Herds and Wildlife in New Zealand
Source: Front Vet Sci. 2018 Oct 30;5:272. doi: 10.3389/fvets.2018.00272 (PMC6218598; doi:10.3389/fvets.2018.00272)
Supplement: Supplementary File 2 — Isolate metadata, coverage statistics, in silico Spoligotype data and metadata explanations. [file Table_2.XLSX]

## Sheet: Isolate_metadata_and_stats
Sequence No.	Year	Host	Area	Region	REA type	VNTR type	R1size	R2size	genome_coverage	ave_coverage	unmapped_reads	spoligtype octalcode	sbcode	spoligotype hexadecimal_code	spoligotyp binarycode
AgR1	1988	Po	Taumarunui	King Country	REA115		162.2MB	162.4MB	99.99%	90.1	34080	664073777777600	SB0140	6D-3-5F-7F-FF-60	1101101000001110111111111111111111111100000
AgR2	1993	Bo	Taumarunui	King Country	REA115		153.9MB	154.2MB	99.99%	85.6	31859	664073777777600	SB0140	6D-3-5F-7F-FF-60	1101101000001110111111111111111111111100000
AgR3	1994	Ce	EastTaupo	Taupo	REA115		167.3MB	167.7MB	99.98%	92.6	36107	664073777777600	SB0140	6D-3-5F-7F-FF-60	1101101000001110111111111111111111111100000
AgR4	1994	Bo	TokomaruBay	East Coast	REA115		159.2MB	159.9MB	99.99%	88.3	33138	664073777777600	SB0140	6D-3-5F-7F-FF-60	1101101000001110111111111111111111111100000
AgR5	1995	Bo	Gisborne	East Coast	REA115		162.0MB	162.7MB	99.99%	90.1	33481	664073777777600	SB0140	6D-3-5F-7F-FF-60	1101101000001110111111111111111111111100000
AgR7	2001	Bo	Hastings	Hawks Bay	REA115		189.9MB	190.3MB	99.99%	105.5	41054	664073777777600	SB0140	6D-3-5F-7F-FF-60	1101101000001110111111111111111111111100000
AgR8	2001	Bo	Napier	Hawks Bay	REA115		190.8MB	191.1MB	99.99%	106.2	42256	664073777777600	SB0140	6D-3-5F-7F-FF-60	1101101000001110111111111111111111111100000
AgR9	1998	Ce	Wanaka	Otago	REA113	VNTR27	173.9MB	174.2MB	99.80%	96.5	37532	664073777777600	SB0140	6D-3-5F-7F-FF-60	1101101000001110111111111111111111111100000
AgR10	2002	Bo	Hastings	Hawks Bay	REA115		169.4MB	170.1MB	100.00%	94.2	34145	664073777777600	SB0140	6D-3-5F-7F-FF-60	1101101000001110111111111111111111111100000
AgR11	1996	Bo	TokomaruBay	East Coast	REA115		174.4MB	174.5MB	99.99%	96.9	36311	664073777777600	SB0140	6D-3-5F-7F-FF-60	1101101000001110111111111111111111111100000
AgR12	1997	Po	PioPio	King Country	REA115		183.3MB	183.9MB	99.99%	101.8	39304	664073777777600	SB0140	6D-3-5F-7F-FF-60	1101101000001110111111111111111111111100000
AgR13	1998	Bo	Taupo	Taupo	REA115		192.0MB	192.3MB	99.99%	106.8	42070	664073777777600	SB0140	6D-3-5F-7F-FF-60	1101101000001110111111111111111111111100000
AgR14	1998	Bo	Taupo	Taupo	REA115		176.7MB	177.7MB	99.99%	97.9	36282	664073777777600	SB0140	6D-3-5F-7F-FF-60	1101101000001110111111111111111111111100000
AgR15	1998	Bo	Taumarunui	King Country	REA115		187.7MB	188.1MB	99.99%	104.3	41558	664073777777600	SB0140	6D-3-5F-7F-FF-60	1101101000001110111111111111111111111100000
AgR16	1998	Bo	PioPio	King Country	REA115		207.7MB	208.0MB	99.99%	115.2	46129	664073777777600	SB0140	6D-3-5F-7F-FF-60	1101101000001110111111111111111111111100000
AgR17	2003	Bo	Hastings	Hawks Bay	REA115		176.2MB	176.5MB	99.99%	97.9	37477	664073777777600	SB0140	6D-3-5F-7F-FF-60	1101101000001110111111111111111111111100000
AgR18	2004	Fe	Turangi	Taupo	REA115		173.7MB	174.3MB	99.98%	96.5	35717	664073777777600	SB0140	6D-3-5F-7F-FF-60	1101101000001110111111111111111111111100000
AgR19	2006	Bo	Turangi	Taupo	REA115		205.2MB	206.3MB	99.98%	114.0	44760	664073777777600	SB0140	6D-3-5F-7F-FF-60	1101101000001110111111111111111111111100000
AgR20	2004	Pi	TimaruCreek	Otago	REA113		210.7MB	211.5MB	99.79%	117.2	45989	664073777777600	SB0140	6D-3-5F-7F-FF-60	1101101000001110111111111111111111111100000
AgR21	2002	Bo	Milton	Otago	REA151		201.8MB	203.4MB	100.00%	111.5	42775	664073777777600	SB0140	6D-3-5F-7F-FF-60	1101101000001110111111111111111111111100000
AgR22	2002	Bo	Turakina	Wanganui	REA115		192.2MB	192.9MB	99.99%	106.8	41762	664073777777600	SB0140	6D-3-5F-7F-FF-60	1101101000001110111111111111111111111100000
AgR23	2005	Bo	Owhango	Taupo	REA266		196.8MB	197.5MB	99.98%	109.4	43079	664073777777600	SB0140	6D-3-5F-7F-FF-60	1101101000001110111111111111111111111100000
AgR24	1992	Bo	Wanganui	Wanganui	REA115		204.9MB	205.6MB	99.99%	113.7	48562	664073777777600	SB0140	6D-3-5F-7F-FF-60	1101101000001110111111111111111111111100000
AgR25	1998	Bo	Taupo	Taupo	REA115		169.0MB	169.1MB	99.99%	93.8	35907	664073777777600	SB0140	6D-3-5F-7F-FF-60	1101101000001110111111111111111111111100000
AgR26	1983	Po	Taumarunui	King Country	REA115	VNTR132	170.6MB	171.2MB	99.99%	94.3	36298	664073777777600	SB0140	6D-3-5F-7F-FF-60	1101101000001110111111111111111111111100000
AgR27	1984	Bo	Taumarunui	King Country	REA115		180.6MB	181.0MB	99.99%	100.3	38394	664073777777600	SB0140	6D-3-5F-7F-FF-60	1101101000001110111111111111111111111100000
AgR28	2002	Bo	Hastings	Hawks Bay	REA123		189.4MB	190.3MB	99.99%	105.3	40761	664073777777600	SB0140	6D-3-5F-7F-FF-60	1101101000001110111111111111111111111100000
AgR29	2002	Bo	Napier	Hawks Bay	REA115		183.4MB	183.8MB	99.99%	101.8	39165	664073777777600	SB0140	6D-3-5F-7F-FF-60	1101101000001110111111111111111111111100000
AgR30	1984	Bo	Taumarunui	King Country	REA115		175.1MB	175.3MB	99.99%	97.3	36960	664073777777600	SB0140	6D-3-5F-7F-FF-60	1101101000001110111111111111111111111100000
AgR31	1994	Bo	Wanganui	Wanganui	REA115		178.3MB	178.8MB	99.99%	99.0	37603	664073777777600	SB0140	6D-3-5F-7F-FF-60	1101101000001110111111111111111111111100000
AgR32	2003	Ce	Ngamatea	Taihape	REA131		178.5MB	179.4MB	99.99%	97.6	55965	664073777777600	SB0140	6D-3-5F-7F-FF-60	1101101000001110111111111111111111111100000
AgR33	2002	Bo	Balclutha	Otago	REA151		163.7MB	164.1MB	100.00%	91.0	34084	664073777777600	SB0140	6D-3-5F-7F-FF-60	1101101000001110111111111111111111111100000
AgR34	1998	Fe	Taupo	Taupo	REA115		154.7MB	155.2MB	99.99%	85.7	31059	664073777777600	SB0140	6D-3-5F-7F-FF-60	1101101000001110111111111111111111111100000
AgR35	2003	Fe	TeHaroto	Hawks Bay	REA115		180.5MB	181.0MB	99.99%	100.3	38480	664073777777600	SB0140	6D-3-5F-7F-FF-60	1101101000001110111111111111111111111100000
AgR36	2002	Bo	Kaitangata	Southland	REA164	VNTR7	172.0MB	172.5MB	100.00%	95.5	35354	664073777777600	SB0140	6D-3-5F-7F-FF-60	1101101000001110111111111111111111111100000
AgR37	1999	Bo	PioPio	King Country	REA115		180.2MB	181.0MB	99.99%	99.8	38838	664073777777600	SB0140	6D-3-5F-7F-FF-60	1101101000001110111111111111111111111100000
AgR38	2001	Bo	Taupo	Taupo	REA115		174.2MB	175.0MB	100.00%	96.4	36774	664073777777600	SB0140	6D-3-5F-7F-FF-60	1101101000001110111111111111111111111100000
AgR39	2002	Bo	Hastings	Hawks Bay	REA131	VNTR1	175.3MB	176.3MB	99.99%	97.2	38322	664073777777600	SB0140	6D-3-5F-7F-FF-60	1101101000001110111111111111111111111100000
AgR40	1992	Bo	Wanganui	Wanganui	REA115		186.0MB	186.6MB	99.99%	103.3	39988	664073777777600	SB0140	6D-3-5F-7F-FF-60	1101101000001110111111111111111111111100000
AgR41	2008	Bo	Napier	Hawks Bay	REA115		177.7MB	178.0MB	99.99%	98.4	38354	664073777777600	SB0140	6D-3-5F-7F-FF-60	1101101000001110111111111111111111111100000
AgR42	1988	Po	Kaiwhaki	Wanganui	REA115		160.2MB	161.2MB	99.99%	88.8	32850	664073777777600	SB0140	6D-3-5F-7F-FF-60	1101101000001110111111111111111111111100000
AgR43	2006	Bo	Napier	Hawks Bay	REA115		171.9MB	172.5MB	99.99%	95.5	36621	664073777777600	SB0140	6D-3-5F-7F-FF-60	1101101000001110111111111111111111111100000
AgR44	2001	Bo	Dannevirke	Hawks Bay	REA121		168.0MB	168.3MB	99.98%	92.8	35885	664073777777600	SB0140	6D-3-5F-7F-FF-60	1101101000001110111111111111111111111100000
AgR45	1996	Bo	Wanganui	Wanganui	REA115		170.0MB	170.8MB	99.99%	93.9	38795	664073777777600	SB0140	6D-3-5F-7F-FF-60	1101101000001110111111111111111111111100000
AgR46	2001	Bo	Dannevirke	Hawks Bay	REA119		162.1MB	162.6MB	99.98%	90.0	34466	664073777777600	SB0140	6D-3-5F-7F-FF-60	1101101000001110111111111111111111111100000
AgR47	1999	Fe	Rangitaiki	Rotorua	REA115		178.7MB	179.6MB	99.99%	99.3	37623	664073777777600	SB0140	6D-3-5F-7F-FF-60	1101101000001110111111111111111111111100000
AgR48	2000	Po	Balclutha	Otago	REA151		195.3MB	195.9MB	100.00%	108.3	42653	664073777777600	SB0140	6D-3-5F-7F-FF-60	1101101000001110111111111111111111111100000
AgR49	1992	Po	Milton	Otago	REA164		178.2MB	178.8MB	100.00%	99.0	38142	664073777777600	SB0140	6D-3-5F-7F-FF-60	1101101000001110111111111111111111111100000
AgR50	2004	Fe	Taupo	Taupo	REA266		168.5MB	169.1MB	100.00%	93.3	35426	664073777777600	SB0140	6D-3-5F-7F-FF-60	1101101000001110111111111111111111111100000
AgR51	1993	Fe	Clyde	Otago	REA198	VNTR27	173.9MB	174.4MB	99.83%	96.3	37321	664073777777600	SB0140	6D-3-5F-7F-FF-60	1101101000001110111111111111111111111100000
AgR52	1996	Fe	Bulls	Manawatu	REA118		171.1MB	171.7MB	99.99%	95.0	36549	664073777777600	SB0140	6D-3-5F-7F-FF-60	1101101000001110111111111111111111111100000
AgR53	1994	Bo	Milton	Otago	REA164		175.3MB	176.0MB	100.00%	97.1	37552	664073777777600	SB0140	6D-3-5F-7F-FF-60	1101101000001110111111111111111111111100000
AgR54	2005	Bo	Taihape	Taihape	REA131		163.2MB	163.9MB	99.99%	90.6	34154	664073777777200	SB0273	6D-3-5F-7F-FF-20	1101101000001110111111111111111111110100000
AgR55	1994	Ce	EastTaupo	Taupo	REA125		168.0MB	168.7MB	99.97%	92.9	35899	664073777777600	SB0140	6D-3-5F-7F-FF-60	1101101000001110111111111111111111111100000
AgR56	1996	Fe	Bulls	Manawatu	REA118	VNTR2	194.0MB	195.2MB	99.99%	106.8	52248	664073777777600	SB0140	6D-3-5F-7F-FF-60	1101101000001110111111111111111111111100000
AgR57	1996	Bo	Hamilton	Waikato	REA151		173.3MB	174.5MB	99.99%	95.8	42291	664073777777600	SB0140	6D-3-5F-7F-FF-60	1101101000001110111111111111111111111100000
AgR58	1995	Bo	PalmerstonNorth	Manawatu	REA118		166.8MB	167.5MB	99.99%	92.6	35279	664073777777600	SB0140	6D-3-5F-7F-FF-60	1101101000001110111111111111111111111100000
AgR59	2001	Ce	Balclutha	Otago	REA151		171.8MB	172.4MB	100.00%	95.4	36422	664073777777600	SB0140	6D-3-5F-7F-FF-60	1101101000001110111111111111111111111100000
AgR60	2002	Bo	Hastings	Hawks Bay	REA124	VNTR2	172.9MB	173.6MB	99.99%	95.9	36084	664073777777600	SB0140	6D-3-5F-7F-FF-60	1101101000001110111111111111111111111100000
AgR61	1999	Bo	Hamilton	Waikato	REA151		175.9MB	176.5MB	99.99%	97.5	39148	664073777777600	SB0140	6D-3-5F-7F-FF-60	1101101000001110111111111111111111111100000
AgR62	1999	Bo	Milton	Otago	REA164		169.7MB	170.7MB	100.00%	92.9	49667	664073777777600	SB0140	6D-3-5F-7F-FF-60	1101101000001110111111111111111111111100000
AgR63	2000	Bo	Rangitaiki	Taupo	REA125	VNTR2	166.5MB	167.1MB	99.99%	92.6	35471	664073777777600	SB0140	6D-3-5F-7F-FF-60	1101101000001110111111111111111111111100000
AgR64	2002	Bo	Taihape	Taihape	REA115		204.0MB	204.6MB	99.99%	113.3	45325	664073777777600	SB0140	6D-3-5F-7F-FF-60	1101101000001110111111111111111111111100000
AgR65	2003	Fe	TeHaroto	Hawks Bay	REA115		178.2MB	179.0MB	99.99%	98.7	40903	664073777777600	SB0140	6D-3-5F-7F-FF-60	1101101000001110111111111111111111111100000
AgR66	1999	Po	Balclutha	Otago	REA151		160.4MB	161.3MB	100.00%	88.5	37004	664073777777600	SB0140	6D-3-5F-7F-FF-60	1101101000001110111111111111111111111100000
AgR67	2000	Bo	Hastings	Hawks Bay	REA115		167.0MB	167.9MB	99.99%	92.4	34603	664073777777600	SB0140	6D-3-5F-7F-FF-60	1101101000001110111111111111111111111100000
AgR69	2007	Bo	TeKauwhata	Waikato	REA151		174.5MB	175.0MB	99.99%	97.0	38092	664073777777600	SB0140	6D-3-5F-7F-FF-60	1101101000001110111111111111111111111100000
AgR70	1997	Bo	Wanaka	Otago	REA198		157.2MB	157.7MB	99.77%	87.3	32569	664073777777600	SB0140	6D-3-5F-7F-FF-60	1101101000001110111111111111111111111100000
AgR71	1997	Bo	Owaka	Otago	REA151		173.2MB	173.6MB	100.00%	96.1	36487	664073777777600	SB0140	6D-3-5F-7F-FF-60	1101101000001110111111111111111111111100000
AgR72	1985	Po	Akaroa	Banks Peninsula	REA225		198.6MB	198.8MB	99.76%	110.2	44172	664073777777600	SB0140	6D-3-5F-7F-FF-60	1101101000001110111111111111111111111100000
AgR73	1997	Fe	Tangimoana	Manawatu	REA118		190.8MB	191.2MB	99.99%	105.9	41513	664073777777600	SB0140	6D-3-5F-7F-FF-60	1101101000001110111111111111111111111100000
AgR74	1992	Fe	LakeTekapo	South Canterbury	REA224	VNTR25	165.8MB	166.9MB	99.78%	91.1	45056	664033777777600	SB0980	6D-1-5F-7F-FF-60	1101101000000110111111111111111111111100000
AgR75	1987	Bo	HaldonStn	Mackenzie Country	REA244		161.5MB	162.1MB	99.79%	89.8	34018	664073777777600	SB0140	6D-3-5F-7F-FF-60	1101101000001110111111111111111111111100000
AgR76	1997	Bo	Oturehua	Otago	REA187		175.9MB	176.5MB	99.78%	97.8	37929	664073777777600	SB0140	6D-3-5F-7F-FF-60	1101101000001110111111111111111111111100000
AgR77	1992	Bo	Taihape	Taihape	REA131		170.9MB	171.4MB	99.99%	94.8	35529	664073777777600	SB0140	6D-3-5F-7F-FF-60	1101101000001110111111111111111111111100000
AgR78	1998	Bo	LittleRiver	Christchurch	REA225		157.7MB	158.3MB	99.78%	87.5	32310	664073777777600	SB0140	6D-3-5F-7F-FF-60	1101101000001110111111111111111111111100000
AgR80	2008	Bo	Bulls	Manawatu	REA118	VNTR2	181.0MB	181.6MB	99.99%	100.6	38554	664073777777600	SB0140	6D-3-5F-7F-FF-60	1101101000001110111111111111111111111100000
AgR81	2005	Bo	Owaka	Otago	REA151		192.7MB	192.9MB	100.00%	107.4	41594	664073777777600	SB0140	6D-3-5F-7F-FF-60	1101101000001110111111111111111111111100000
AgR82	1998	Bo	Himatangi	Manawatu	REA118		181.0MB	183.2MB	99.99%	98.8	40376	664073777777600	SB0140	6D-3-5F-7F-FF-60	1101101000001110111111111111111111111100000
AgR83	1985	Po	Curragemore	Mackenzie Country	REA198		161.5MB	162.1MB	99.80%	89.4	33511	664073777777600	SB0140	6D-3-5F-7F-FF-60	1101101000001110111111111111111111111100000
AgR84	1999	Bo	Balclutha	Otago	REA151		184.4MB	184.8MB	100.00%	102.6	39149	664073777777600	SB0140	6D-3-5F-7F-FF-60	1101101000001110111111111111111111111100000
AgR85	1998	Bo	Balclutha	Otago	REA151		170.7MB	171.3MB	100.00%	94.7	35031	664073777777600	SB0140	6D-3-5F-7F-FF-60	1101101000001110111111111111111111111100000
AgR86	2005	Bo	Bulls	Manawatu	REA118		167.1MB	168.0MB	99.99%	92.1	40114	664073777777600	SB0140	6D-3-5F-7F-FF-60	1101101000001110111111111111111111111100000
AgR88	1997	Bo	Owaka	Otago	REA151		173.0MB	173.5MB	99.99%	96.1	36923	664073777777600	SB0140	6D-3-5F-7F-FF-60	1101101000001110111111111111111111111100000
AgR89	2007	Fe	Taihape	Taihape	REA131		167.6MB	168.6MB	99.99%	93.3	35680	664073777777600	SB0140	6D-3-5F-7F-FF-60	1101101000001110111111111111111111111100000
AgR90	2006	Bo	Bulls	Manawatu	REA118		205.7MB	205.8MB	99.99%	114.2	44278	664073777777600	SB0140	6D-3-5F-7F-FF-60	1101101000001110111111111111111111111100000
AgR91	1992	Fe	Milton	Otago	REA164		165.4MB	166.1MB	100.00%	91.2	36058	664073777777600	SB0140	6D-3-5F-7F-FF-60	1101101000001110111111111111111111111100000
AgR92	1999	Bo	Taihape	Taihape	REA131		174.6MB	175.4MB	99.99%	96.8	35406	664073777777600	SB0140	6D-3-5F-7F-FF-60	1101101000001110111111111111111111111100000
AgR93	1996	Bo	TeKauwhata	Waikato	REA151		167.3MB	168.3MB	99.99%	92.3	37912	664073777777600	SB0140	6D-3-5F-7F-FF-60	1101101000001110111111111111111111111100000
AgR94	1997	Po	Bulls	Manawatu	REA118		179.9MB	180.5MB	99.99%	99.7	38100	664073777777600	SB0140	6D-3-5F-7F-FF-60	1101101000001110111111111111111111111100000
AgR95	1997	Ce	Balclutha	Otago	REA151		176.0MB	176.4MB	100.00%	97.7	37822	664073777777600	SB0140	6D-3-5F-7F-FF-60	1101101000001110111111111111111111111100000
AgR96	1999	Po	NorthOtago	Otago	REA187		169.1MB	169.8MB	99.77%	94.0	36090	664073777777600	SB0140	6D-3-5F-7F-FF-60	1101101000001110111111111111111111111100000
AgR100	1992	Po	Lumsden	Southland	REA198		199.8MB	200.6MB	99.77%	114.0	47596	664073777777600	SB0140	6D-3-5F-7F-FF-60	1101101000001110111111111111111111111100000
AgR101	2006	Bo	Napier	Hawks Bay	REA131		200.6MB	201.4MB	99.97%	114.9	47734	664073777777200	SB0273	6D-3-5F-7F-FF-20	1101101000001110111111111111111111110100000
AgR102	2008	Bo	LindisPass	Otago	REA226		195.2MB	196.0MB	99.79%	111.6	45877	064073777777600	SB0484	D-3-5F-7F-FF-60	0001101000001110111111111111111111111100000
AgR103	1992	Ce	Milton	Otago	REA151		204.1MB	204.9MB	100.00%	116.5	49256	664073777777600	SB0140	6D-3-5F-7F-FF-60	1101101000001110111111111111111111111100000
AgR104	1985	Po	Owaka	Otago	REA151		206.1MB	206.7MB	100.00%	117.9	50595	664073777777600	SB0140	6D-3-5F-7F-FF-60	1101101000001110111111111111111111111100000
AgR105	2001	Fe	Wanaka	Otago	REA198		138.7MB	138.8MB	99.79%	79.1	31234	664073777777600	SB0140	6D-3-5F-7F-FF-60	1101101000001110111111111111111111111100000
AgR106	1993	Fe	Milton	Otago	REA151		141.5MB	142.2MB	100.00%	80.8	30442	664073777777600	SB0140	6D-3-5F-7F-FF-60	1101101000001110111111111111111111111100000
AgR107	1988	Po	HaldonStn	Mackenzie Country	REA244		147.6MB	147.9MB	99.77%	84.3	32728	664033777777600	SB0980	6D-1-5F-7F-FF-60	1101101000000110111111111111111111111100000
AgR108	2000	Bo	Blenheim	Blenheim	REA67		168.4MB	169.1MB	99.74%	96.1	38864	676573777776200	SB1504	6F-57-5F-7F-FE-20	1101111101011110111111111111111111100100000
AgR109	1993	Bo	Blenheim	Blenheim	REA66		145.7MB	146.0MB	99.72%	83.2	33670	676573777776200	SB1504	6F-57-5F-7F-FE-20	1101111101011110111111111111111111100100000
AgR110	1992	Pi	TopValley	Blenheim	REA62		148.6MB	149.3MB	99.74%	84.7	33147	676573777776200	SB1504	6F-57-5F-7F-FE-20	1101111101011110111111111111111111100100000
AgR111	1987	Po	StnBF	Mackenzie Country	REA11		119.4MB	141.9MB	99.60%	73.0	1929	676573777777600	SB0130	6F-57-5F-7F-FF-60	1101111101011110111111111111111111111100000
AgR112	1993	Po	TopValley	Blenheim	REA62		157.2MB	157.7MB	99.73%	89.8	36588	676573777776200	SB1504	6F-57-5F-7F-FE-20	1101111101011110111111111111111111100100000
AgR113	2001	Bo	Gore	Southland	REA93		158.9MB	159.3MB	99.92%	90.5	37191	674573777777600	SB1031	6F-17-5F-7F-FF-60	1101111001011110111111111111111111111100000
AgR114	1992	Bo	Hawarden	North Canterbury	REA62		134.9MB	135.3MB	99.72%	77.0	30442	676573777776200	SB1504	6F-57-5F-7F-FE-20	1101111101011110111111111111111111100100000
AgR116	2002	Fe	Blenheim	Marlborough	REA244		158.5MB	159.1MB	99.73%	90.4	37640	676572377776200	N/A	6F-57-53-7F-FE-20	1101111101011110100111111111111111100100000
AgR117	1993	Fe	Kaikouraoura	Blenheim	REA62		156.0MB	156.6MB	99.46%	89.1	35816	676573777776200	SB1504	6F-57-5F-7F-FE-20	1101111101011110111111111111111111100100000
AgR118	1993	Bo	Amberley	Kaikoura	REA62		147.6MB	148.2MB	99.65%	84.0	33221	676573777776200	SB1504	6F-57-5F-7F-FE-20	1101111101011110111111111111111111100100000
AgR119	1983	Po	Taumarunui	King Country	REA115		141.8MB	142.1MB	99.99%	81.0	32817	664073777777600	SB0140	6D-3-5F-7F-FF-60	1101101000001110111111111111111111111100000
AgR120	1993	Fel	Hawarden	North Canterbury	REA62		153.4MB	154.0MB	99.74%	87.6	35205	676573777776200	SB1504	6F-57-5F-7F-FE-20	1101111101011110111111111111111111100100000
AgR121	1988	Bo	StnBF	Mackenzie Country	REA11	VNTR46	96.9MB	113.7MB	99.50%	58.4	1276	676573777777600	SB0130	6F-57-5F-7F-FF-60	1101111101011110111111111111111111111100000
AgR123	1992	Pi	TopValley	Blenheim	REA62		150.6MB	151.1MB	99.73%	85.9	37281	676573777776200	SB1504	6F-57-5F-7F-FE-20	1101111101011110111111111111111111100100000
AgR124	1993	Po	TopValley	Blenheim	REA62		139.4MB	139.7MB	99.75%	79.5	32191	676573777776200	SB1504	6F-57-5F-7F-FE-20	1101111101011110111111111111111111100100000
AgR125	1992	Fe	StnH	Mackenzie Country	REA19	VNTR43	88.7MB	104.0MB	99.67%	54.4	940	676573777777600	SB0130	6F-57-5F-7F-FF-60	1101111101011110111111111111111111111100000
AgR126	1991	Fe	Twizel	Mackenzie Country	REA11		78.7MB	90.5MB	99.55%	47.5	821	676573777777600	SB0130	6F-57-5F-7F-FF-60	1101111101011110111111111111111111111100000
AgR127	1992	Pi	Hokonui	Southland	REA93		137.8MB	138.5MB	99.92%	78.3	31095	674573777777600	SB1031	6F-17-5F-7F-FF-60	1101111001011110111111111111111111111100000
AgR128	1989	Bo	Ross	West Coast	REA1		89.8MB	103.7MB	99.39%	56.3	885	676573777777600	SB0130	6F-57-5F-7F-FF-60	1101111101011110111111111111111111111100000
AgR129	1982	Pi	Kaikouraoura	Kaikoura	REA62		163.2MB	163.6MB	99.73%	93.1	37975	676573777776200	SB1504	6F-57-5F-7F-FE-20	1101111101011110111111111111111111100100000
AgR130	1999	Bo	Gore	Southland	REA93		157.4MB	158.4MB	99.92%	89.9	36251	674573777777600	SB1031	6F-17-5F-7F-FF-60	1101111001011110111111111111111111111100000
AgR131	1992	Po	Hawarden	North Canterbury	REA62		149.6MB	150.4MB	99.74%	85.3	33536	676573777776200	SB1504	6F-57-5F-7F-FE-20	1101111101011110111111111111111111100100000
AgR132	1982	Po	Kumara	West Coast	REA1		102.9MB	120.7MB	99.40%	66.3	1271	676573777777600	SB0130	6F-57-5F-7F-FF-60	1101111101011110111111111111111111111100000
AgR133	1998	Bo	Gore	Southland	REA93		133.7MB	134.0MB	99.92%	76.2	29461	674573777777600	SB1031	6F-17-5F-7F-FF-60	1101111001011110111111111111111111111100000
AgR134	1987	Pi	Kaikouraoura	Kaikoura	REA62		150.7MB	151.5MB	99.74%	85.9	33531	676573777776200	SB1504	6F-57-5F-7F-FE-20	1101111101011110111111111111111111100100000
AgR135	1992	Bo	Amberley	North Canterbury	REA62		159.6MB	160.1MB	99.73%	89.7	51001	676573777776200	SB1504	6F-57-5F-7F-FE-20	1101111101011110111111111111111111100100000
AgR136	1991	Bo	Twizel	Mackenzie Country	REA11		95.7MB	111.1MB	99.49%	61.2	915	676573777777600	SB0130	6F-57-5F-7F-FF-60	1101111101011110111111111111111111111100000
AgR137	1993	Bo	Winton	Southland	REA93		153.3MB	153.9MB	99.92%	87.6	35040	674573777777600	SB1031	6F-17-5F-7F-FF-60	1101111001011110111111111111111111111100000
AgR138	1995	Bo	Amberley	North Canterbury	REA62		148.7MB	148.9MB	99.74%	83.7	74528	676573777776200	SB1504	6F-57-5F-7F-FE-20	1101111101011110111111111111111111100100000
AgR139	1998	Fe	Hokonui	Southland	REA93		170.0MB	170.4MB	99.92%	97.1	39190	674573777777600	SB1031	6F-17-5F-7F-FF-60	1101111001011110111111111111111111111100000
AgR140	1993	Fe	Culverden	North Canterbury	REA62		157.1MB	157.9MB	99.72%	89.6	35113	676573777776200	SB1504	6F-57-5F-7F-FE-20	1101111101011110111111111111111111100100000
AgR141	2001	Po	Blenheim	Blenheim	REA67		169.7MB	170.2MB	99.73%	96.6	40567	676573777776200	SB1504	6F-57-5F-7F-FE-20	1101111101011110111111111111111111100100000
AgR142	1994	Bo	Gore	Southland			147.1MB	147.7MB	99.92%	83.7	33378	674573777777600	SB1031	6F-17-5F-7F-FF-60	1101111001011110111111111111111111111100000
AgR143	2001	Fe	Blenheim	Blenheim	REA67		144.7MB	145.5MB	99.73%	82.3	33876	676573777776200	SB1504	6F-57-5F-7F-FE-20	1101111101011110111111111111111111100100000
AgR144	1994	Bo	TopValley	Blenheim	REA62		143.9MB	144.5MB	99.72%	82.1	32677	676573777776200	SB1504	6F-57-5F-7F-FE-20	1101111101011110111111111111111111100100000
AgR146	1984	Po	Westport	West Coast	REA11		95.4MB	112.0MB	99.57%	61.6	1006	676573777777600	SB0130	6F-57-5F-7F-FF-60	1101111101011110111111111111111111111100000
AgR147	1996	Bo	Amberley	North Canterbury	REA62		152.5MB	153.1MB	99.73%	86.8	35668	676573777776200	SB1504	6F-57-5F-7F-FE-20	1101111101011110111111111111111111100100000
AgR148	1995	Bo	Gore	Southland	REA93		145.7MB	146.9MB	99.92%	82.9	33044	674573777777600	SB1031	6F-17-5F-7F-FF-60	1101111001011110111111111111111111111100000
AgR149	2002	Fe	Blenheim	Blenheim	REA247		156.8MB	157.4MB	99.69%	89.6	36069	676573777776200	SB1504	6F-57-5F-7F-FE-20	1101111101011110111111111111111111100100000
AgR150	1988	Ce	StnH	Mackenzie Country	REA19	VNTR43	98.2MB	113.0MB	99.69%	62.9	829	676573777777600	SB0130	6F-57-5F-7F-FF-60	1101111101011110111111111111111111111100000
AgR151	2001	Pi	Blenheim	Blenheim	REA67	VNTR20	151.0MB	151.7MB	99.73%	85.8	34755	676573777776200	SB1504	6F-57-5F-7F-FE-20	1101111101011110111111111111111111100100000
AgR152	1997	Bo	Gore	Southland	REA93		148.1MB	149.0MB	99.92%	84.0	35640	674573777777600	SB1031	6F-17-5F-7F-FF-60	1101111001011110111111111111111111111100000
AgR153	1993	Fe	Culverden	North Canterbury	REA62		138.1MB	138.5MB	99.73%	78.8	31152	676573777776200	SB1504	6F-57-5F-7F-FE-20	1101111101011110111111111111111111100100000
AgR154	2003	Fe	WairauValley	Marlborough	REA248		140.2MB	140.9MB	99.74%	80.0	30999	676573777776200	SB1504	6F-57-5F-7F-FE-20	1101111101011110111111111111111111100100000
AgR155	1983	Po	Ahaura	West Coast	REA21		90.2MB	106.0MB	99.66%	57.7	879	676573777777600	SB0130	6F-57-5F-7F-FF-60	1101111101011110111111111111111111111100000
AgR156	1990	Bo	Napier	Hawks Bay	REA115		134.2MB	134.7MB	99.98%	76.4	29925	664073777777600	SB0140	6D-3-5F-7F-FF-60	1101101000001110111111111111111111111100000
AgR157	2005	Bo	Hawarden	North Canterbury	REA62		158.8MB	159.5MB	99.74%	90.7	36495	676573777776200	SB1504	6F-57-5F-7F-FE-20	1101111101011110111111111111111111100100000
AgR158	2004	Bo	Kaikouraoura	Kaikoura	REA62		161.5MB	162.5MB	99.73%	91.8	36449	676573777776200	SB1504	6F-57-5F-7F-FE-20	1101111101011110111111111111111111100100000
AgR159	2004	Bo	Gore	Southland	REA93		180.4MB	181.0MB	99.92%	102.8	41777	674573777777600	SB1031	6F-17-5F-7F-FF-60	1101111001011110111111111111111111111100000
AgR160	2005	Bo	BlytheValley	North Canterbury	REA67		165.7MB	166.5MB	99.73%	94.5	38647	676573777776200	SB1504	6F-57-5F-7F-FE-20	1101111101011110111111111111111111100100000
AgR161	1999	Bo	CheviotHills	North Canterbury	REA62		147.3MB	148.0MB	99.73%	83.8	33488	676573777776200	SB1504	6F-57-5F-7F-FE-20	1101111101011110111111111111111111100100000
AgR162	1989	Po	Tabletop	Otago	REA164		140.0MB	140.6MB	100.00%	79.8	31960	664073777777600	SB0140	6D-3-5F-7F-FF-60	1101101000001110111111111111111111111100000
AgR163	2005	Bo	Kaikouraoura	Kaikoura	REA67		147.1MB	147.4MB	99.72%	83.6	33349	676573777776200	SB1504	6F-57-5F-7F-FE-20	1101111101011110111111111111111111100100000
AgR164	2002	Fe	Blenheim	Blenheim	REA247		134.7MB	135.9MB	99.66%	76.0	34940	676573777776200	SB1504	6F-57-5F-7F-FE-20	1101111101011110111111111111111111100100000
AgR165	2005	Bo	Blenheim	Blenheim	REA67		144.7MB	146.0MB	99.74%	82.2	36295	676573777776200	SB1504	6F-57-5F-7F-FE-20	1101111101011110111111111111111111100100000
AgR166	2002	Bo	Gore	Southland	REA93		161.1MB	161.6MB	99.93%	91.8	37783	674573777777600	SB1031	6F-17-5F-7F-FF-60	1101111001011110111111111111111111111100000
AgR167	2005	Bo	BlytheValley	North Canterbury	REA67		158.4MB	159.4MB	99.76%	90.3	36179	676573777776200	SB1504	6F-57-5F-7F-FE-20	1101111101011110111111111111111111100100000
AgR168	2002	Bo	Gore	Southland	REA241		160.2MB	160.8MB	99.92%	91.5	36640	674573777777600	SB1031	6F-17-5F-7F-FF-60	1101111001011110111111111111111111111100000
AgR169	2003	Fe	Rangiora	Canterbury	REA62		144.3MB	145.1MB	99.73%	82.1	33492	676573777776200	SB1504	6F-57-5F-7F-FE-20	1101111101011110111111111111111111100100000
AgR170	2004	Fe	Hokonui	Southland	REA93		143.8MB	144.8MB	99.93%	81.0	41994	674573777777600	SB1031	6F-17-5F-7F-FF-60	1101111001011110111111111111111111111100000
AgR171	2000	Bo	Gore	Southland	REA93		151.2MB	151.8MB	99.93%	86.5	34197	674573777777600	SB1031	6F-17-5F-7F-FF-60	1101111001011110111111111111111111111100000
AgR172	2008	Fe	Wairau	Marlborough	REA277		138.2MB	138.5MB	99.73%	78.8	31620	676573777776200	SB1504	6F-57-5F-7F-FE-20	1101111101011110111111111111111111100100000
AgR173	2002	Fe	Blenheim	Blenheim	REA249		178.3MB	179.1MB	99.73%	101.6	44699	676573777776200	SB1504	6F-57-5F-7F-FE-20	1101111101011110111111111111111111100100000
AgR174	2003	Bo	Gore	Southland	REA93		131.8MB	132.5MB	99.91%	74.8	31602	674573777777600	SB1031	6F-17-5F-7F-FF-60	1101111001011110111111111111111111111100000
AgR175	1999	Bo	Kaikouraoura	Kaikoura	REA251		154.5MB	155.3MB	99.74%	87.9	35542	676573777776200	SB1504	6F-57-5F-7F-FE-20	1101111101011110111111111111111111100100000
AgR176	1991	Bo	Hawarden	North Canterbury	REA62		164.1MB	164.8MB	99.74%	93.4	37525	676573777776200	SB1504	6F-57-5F-7F-FE-20	1101111101011110111111111111111111100100000
AgR177	2002	Fe	MolesworthStn	Marlborough	REA62		158.8MB	159.6MB	99.72%	90.7	36817	676573777776200	SB1504	6F-57-5F-7F-FE-20	1101111101011110111111111111111111100100000
AgR178	2005	Fe	AmberleyHills	Canterbury	REA62		164.2MB	165.2MB	99.73%	93.6	37144	676573777776200	SB1504	6F-57-5F-7F-FE-20	1101111101011110111111111111111111100100000
AgR179	1996	Fe	Cheviot	North Canterbury	REA62		148.1MB	148.7MB	99.72%	84.5	33321	676573777776200	SB1504	6F-57-5F-7F-FE-20	1101111101011110111111111111111111100100000
AgR181	2000	Bo	Blenheim	Blenheim	REA67		130.2MB	130.6MB	99.72%	74.2	27943	676573777776200	SB1504	6F-57-5F-7F-FE-20	1101111101011110111111111111111111100100000
AgR182	2003	Bo	Culverden	North Canterbury	REA62		119.2MB	120.0MB	99.73%	67.4	30525	676573777776200	SB1504	6F-57-5F-7F-FE-20	1101111101011110111111111111111111100100000
AgR183	2003	Ce	Cheviot	North Canterbury	REA62		152.5MB	153.1MB	99.73%	87.2	34835	676573777776200	SB1504	6F-57-5F-7F-FE-20	1101111101011110111111111111111111100100000
AgR184	1999	Bo	GretaValley	Canterbury	REA62		158.1MB	159.0MB	99.73%	90.2	36667	676573777776200	SB1504	6F-57-5F-7F-FE-20	1101111101011110111111111111111111100100000
AgR186	2004	Ce	Loburn	Kaikoura	REA62		152.0MB	152.6MB	99.73%	86.6	34679	676573777776200	SB1504	6F-57-5F-7F-FE-20	1101111101011110111111111111111111100100000
AgR187	1999	Fe	GretaValley	Canterbury	REA62		149.9MB	150.8MB	99.72%	85.3	34103	676573777776200	SB1504	6F-57-5F-7F-FE-20	1101111101011110111111111111111111100100000
AgR188	1991	Bo	Culverden	North Canterbury	REA62		160.3MB	160.8MB	99.74%	91.4	37039	676573777776200	SB1504	6F-57-5F-7F-FE-20	1101111101011110111111111111111111100100000
AgR189	1998	Bo	Wanganui	Wanganui	REA115		160.3MB	160.6MB	99.99%	91.7	36839	664073777777600	SB0140	6D-3-5F-7F-FF-60	1101101000001110111111111111111111111100000
AgR190	2005	St	AshleyBuffer	Canterbury	REA62		154.7MB	156.3MB	99.74%	86.8	36552	676573777776200	SB1504	6F-57-5F-7F-FE-20	1101111101011110111111111111111111100100000
AgR191	1988	Pi	Hokitika	West Coast	REA1		93.2MB	109.2MB	99.53%	59.9	899	676573777777600	SB0130	6F-57-5F-7F-FF-60	1101111101011110111111111111111111111100000
AgR192	2001	Po	MolesworthStn	Marlborough	REA62	VNTR20	156.0MB	156.5MB	99.75%	88.8	35281	676573777776200	SB1504	6F-57-5F-7F-FE-20	1101111101011110111111111111111111100100000
AgR193	2004	Bo	Napier	Hawks Bay	REA115		159.9MB	160.5MB	99.99%	91.3	36514	664073777777600	SB0140	6D-3-5F-7F-FF-60	1101101000001110111111111111111111111100000
AgR194	1993	Ce	Hawarden	North Canterbury	REA62		151.8MB	152.5MB	99.73%	86.5	33953	676573777776200	SB1504	6F-57-5F-7F-FE-20	1101111101011110111111111111111111100100000
AgR195	1994	Po	Ashley	Canterbury	REA62		157.2MB	158.2MB	99.73%	89.1	40423	676573777776200	SB1504	6F-57-5F-7F-FE-20	1101111101011110111111111111111111100100000
AgR196	2005	Bo	Kaikouraoura	Kaikoura	REA62		149.4MB	150.0MB	99.73%	85.2	33816	676573777776200	SB1504	6F-57-5F-7F-FE-20	1101111101011110111111111111111111100100000
AgR197	1983	Po	Greymouth	West Coast	REA1		111.8MB	129.2MB	99.51%	68.9	1455	676573777777600	SB0130	6F-57-5F-7F-FF-60	1101111101011110111111111111111111111100000
AgR198	1993	Bo	Rangiora	Canterbury	REA62		147.0MB	148.0MB	99.73%	84.0	33264	676573777776200	SB1504	6F-57-5F-7F-FE-20	1101111101011110111111111111111111100100000
AgR199	1999	Bo	Kaikouraoura	Kaikoura	REA62		155.0MB	155.5MB	99.73%	88.1	34285	676573777776200	SB1504	6F-57-5F-7F-FE-20	1101111101011110111111111111111111100100000
AgR200	1985	Po	Westport	West Coast	REA21		141.6MB	165.8MB	99.67%	90.8	2337	676573777777600	SB0130	6F-57-5F-7F-FF-60	1101111101011110111111111111111111111100000
AgR215	2006	Pi	AshleyBuffer	Canterbury	REA62		429.8MB	437.6MB	99.73%	225.4	103328	676573777776200	SB1504	6F-57-5F-7F-FE-20	1101111101011110111111111111111111100100000
AgR217	1998	Bo	Rangiora	Canterbury	REA62		465.7MB	473.0MB	99.73%	242.7	110194	676573777776200	SB1504	6F-57-5F-7F-FE-20	1101111101011110111111111111111111100100000
AgR218	2006	Fe	Amberley	Canterbury	REA62		456.4MB	464.2MB	99.71%	239.2	106582	676573777776200	SB1504	6F-57-5F-7F-FE-20	1101111101011110111111111111111111100100000
AgR219	2006	Bo	Kaikouraoura	Kaikoura	REA244		479.4MB	487.8MB	99.74%	251.7	114648	674573777776200	N/A	6F-17-5F-7F-FE-20	1101111001011110111111111111111111100100000
AgR220	2005	Bo	Cheviot	North Canterbury	REA62		476.0MB	484.9MB	99.65%	250.2	114344	676573777776200	SB1504	6F-57-5F-7F-FE-20	1101111101011110111111111111111111100100000
AgR221	2006	Fe	Hawarden	North Canterbury	REA67		367.1MB	375.0MB	99.74%	192.1	79312	676573777776200	SB1504	6F-57-5F-7F-FE-20	1101111101011110111111111111111111100100000
AgR222	1987	Bo	GlenmoreStn	Mackenzie Country	REA12		138.2MB	163.6MB	99.59%	90.0	2171	676573777777600	SB0130	6F-57-5F-7F-FF-60	1101111101011110111111111111111111111100000
AgR223	2005	Bo	Blenheim	North Canterbury	REA66		342.6MB	349.2MB	99.73%	179.9	70447	676573777776200	SB1504	6F-57-5F-7F-FE-20	1101111101011110111111111111111111100100000
AgR224	2007	Bo	Gore	Southland	REA93		402.9MB	410.6MB	99.92%	211.5	88040	674573777777600	SB1031	6F-17-5F-7F-FF-60	1101111001011110111111111111111111111100000
AgR225	1997	Fe	Twizel	Mackenzie Country	REA12		118.9MB	140.0MB	99.55%	77.7	1599	676573777777600	SB0130	6F-57-5F-7F-FF-60	1101111101011110111111111111111111111100000
AgR226	2009	Bo	Hawarden	North Canterbury	REA62		381.3MB	389.3MB	99.73%	200.1	83268	676573777776200	SB1504	6F-57-5F-7F-FE-20	1101111101011110111111111111111111100100000
AgR227	2001	Ce	Karamea	West Coast	REA21		143.4MB	171.4MB	99.67%	92.3	2100	676573777777600	SB0130	6F-57-5F-7F-FF-60	1101111101011110111111111111111111111100000
AgR229	2001	Bo	Hokitika	West Coast	REA6	VNTR59	150.7MB	180.4MB	99.57%	97.7	2243	676573777777600	SB0130	6F-57-5F-7F-FF-60	1101111101011110111111111111111111111100000
AgR230	2009	Bo	GretaValley	Canterbury	REA62		442.4MB	450.5MB	99.73%	232.2	103883	676573777776200	SB1504	6F-57-5F-7F-FE-20	1101111101011110111111111111111111100100000
AgR231	2008	Bo	Kaikouraoura	Kaikoura	REA67		451.5MB	460.7MB	99.73%	236.8	104450	676573777776200	SB1504	6F-57-5F-7F-FE-20	1101111101011110111111111111111111100100000
AgR232	2007	Po	Greymouth	West Coast	REA6		117.1MB	141.7MB	99.59%	77.6	1341	676573777777600	SB0130	6F-57-5F-7F-FF-60	1101111101011110111111111111111111111100000
AgR233	2010	Bo	Hokitika	West Coast	REA6	VNTR59	130.1MB	157.7MB	99.57%	85.9	1973	676573777777600	SB0130	6F-57-5F-7F-FF-60	1101111101011110111111111111111111111100000
AgR234	2011	Bo	Karamea	West Coast	REA20	VNTR21	147.4MB	175.5MB	99.71%	97.9	2274	676573777777600	SB0130	6F-57-5F-7F-FF-60	1101111101011110111111111111111111111100000
AgR235	1998	Bo	Harihari	West Coast	REA20		136.6MB	166.4MB	99.73%	91.3	2267	676573777777600	SB0130	6F-57-5F-7F-FF-60	1101111101011110111111111111111111111100000
AgR236	1994	Ce	WangapekaValley	West Coast	REA11		121.1MB	146.7MB	99.58%	83.0	1495	676573777777600	SB0130	6F-57-5F-7F-FF-60	1101111101011110111111111111111111111100000
AgR237	2003	Bo	Inangahua	West Coast	REA21		84.5MB	98.8MB	99.60%	55.5	807	676573777777600	SB0130	6F-57-5F-7F-FF-60	1101111101011110111111111111111111111100000
AgR238	2011	Bo	Inchbonnie	West Coast	REA6	VNTR59	115.5MB	137.1MB	99.54%	77.4	1759	676573777777600	SB0130	6F-57-5F-7F-FF-60	1101111101011110111111111111111111111100000
AgR239	2002	Po	Karamea	West Coast	REA12		110.8MB	130.1MB	99.58%	74.8	1360	676573777777600	SB0130	6F-57-5F-7F-FF-60	1101111101011110111111111111111111111100000
AgR241	1998	Po	SpringsJunction	West Coast	REA62	VNTR65	466.2MB	476.0MB	99.73%	244.6	110338	676573777776200	SB1504	6F-57-5F-7F-FE-20	1101111101011110111111111111111111100100000
AgR242	2007	Bo	Ross	West Coast	REA16		105.2MB	122.6MB	99.44%	61.2	1789	676573777777600	SB0130	6F-57-5F-7F-FF-60	1101111101011110111111111111111111111100000
AgR244	2011	Bo	Karamea	West Coast	REA12	VNTR86	110.3MB	130.8MB	99.57%	73.9	1502	676573777777600	SB0130	6F-57-5F-7F-FF-60	1101111101011110111111111111111111111100000
AgR245	2008	Bo	Karamea	West Coast	REA12		119.5MB	138.9MB	99.59%	77.9	1466	676573777777600	SB0130	6F-57-5F-7F-FF-60	1101111101011110111111111111111111111100000
AgR246	2008	Bo	Westport	West Coast	REA11		95.2MB	113.2MB	99.60%	64.2	1177	676573777777600	SB0130	6F-57-5F-7F-FF-60	1101111101011110111111111111111111111100000
AgR247	2002	Bo	Karamea	West Coast	REA21		106.6MB	126.5MB	99.68%	72.2	1346	676573777777600	SB0130	6F-57-5F-7F-FF-60	1101111101011110111111111111111111111100000
AgR248	2008	Bo	Ahaura	West Coast	REA21		101.7MB	119.2MB	99.47%	58.2	1920	676573777777600	SB0130	6F-57-5F-7F-FF-60	1101111101011110111111111111111111111100000
AgR249	1999	Po	Ahaura	West Coast	REA27		85.9MB	98.9MB	99.63%	53.7	711	676573777777600	SB0130	6F-57-5F-7F-FF-60	1101111101011110111111111111111111111100000
AgR250	2006	Bo	Karamea	West Coast	REA20		102.0MB	119.1MB	99.58%	65.4	1100	676573777777600	SB0130	6F-57-5F-7F-FF-60	1101111101011110111111111111111111111100000
AgR251	2006	Bo	Karamea	West Coast	REA12		105.4MB	122.1MB	99.53%	68.9	1043	676573777777600	SB0130	6F-57-5F-7F-FF-60	1101111101011110111111111111111111111100000
AgR252	1999	Po	Ahaura	West Coast	REA27		100.2MB	117.2MB	99.61%	64.0	948	676573777777600	SB0130	6F-57-5F-7F-FF-60	1101111101011110111111111111111111111100000
AgR253	2005	Bo	Karamea	West Coast	REA20		102.9MB	120.8MB	99.65%	68.3	1256	676573777777600	SB0130	6F-57-5F-7F-FF-60	1101111101011110111111111111111111111100000
AgR254	2010	Bo	Dobson	West Coast	REA27	VNTR35	97.1MB	111.5MB	99.70%	63.2	938	676573777777600	SB0130	6F-57-5F-7F-FF-60	1101111101011110111111111111111111111100000
AgR255	2008	Bo	Dobson	West Coast	REA27		98.9MB	116.4MB	99.72%	65.9	1012	676573777777600	SB0130	6F-57-5F-7F-FF-60	1101111101011110111111111111111111111100000
AgR256	2006	Bo	Kaikouraoura	Kaikoura	REA62		458.4MB	466.6MB	99.75%	240.2	107857	676573777776200	SB1504	6F-57-5F-7F-FE-20	1101111101011110111111111111111111100100000
AgR257	2009	Bo	Rangiora	Canterbury	REA62		447.2MB	453.6MB	99.74%	234.6	106182	676573677776200	N/A	6F-57-5E-7F-FE-20	1101111101011110111101111111111111100100000
AgR258	2009	Bo	GretaValley	Canterbury	REA62		446.6MB	455.2MB	99.73%	234.5	103433	676573777776200	SB1504	6F-57-5F-7F-FE-20	1101111101011110111111111111111111100100000
AgR259	2009	Po	DonavanFlats	West Coast	REA16		90.0MB	105.2MB	99.63%	58.6	915	676573777777600	SB0130	6F-57-5F-7F-FF-60	1101111101011110111111111111111111111100000
AgR260	1999	Pi	Ahaura	West Coast	REA34		119.5MB	141.8MB	99.55%	78.5	1487	676573777777600	SB0130	6F-57-5F-7F-FF-60	1101111101011110111111111111111111111100000
AgR261	2005	Bo	Karamea	West Coast	REA12		145.8MB	175.4MB	99.56%	94.6	2481	676573777777600	SB0130	6F-57-5F-7F-FF-60	1101111101011110111111111111111111111100000
AgR262	2005	Bo	Karamea	West Coast	REA20		108.6MB	129.0MB	99.70%	71.0	1333	676573777777600	SB0130	6F-57-5F-7F-FF-60	1101111101011110111111111111111111111100000
AgR263	2008	Bo	Hokitika	West Coast	REA6		112.1MB	134.4MB	99.53%	74.1	1237	676573777777600	SB0130	6F-57-5F-7F-FF-60	1101111101011110111111111111111111111100000
AgR264	1989	Po	Mikonui	West Coast	REA1		135.7MB	163.5MB	99.59%	90.3	2149	676573777777600	SB0130	6F-57-5F-7F-FF-60	1101111101011110111111111111111111111100000
AgR265	2004	Bo	Westport	West Coast	REA21		129.7MB	152.4MB	99.73%	84.1	1814	676573777777600	SB0130	6F-57-5F-7F-FF-60	1101111101011110111111111111111111111100000
AgR266	2007	Po	Westland	West Coast	REA6		121.0MB	146.5MB	99.54%	80.7	1817	676573777777600	SB0130	6F-57-5F-7F-FF-60	1101111101011110111111111111111111111100000
AgR267	1999	Ce	Hochstetter	West Coast	REA16		87.3MB	103.6MB	99.65%	55.1	923	676573777777600	SB0130	6F-57-5F-7F-FF-60	1101111101011110111111111111111111111100000
AgR268	2005	Bo	Karamea	West Coast	REA12		117.8MB	137.3MB	99.45%	74.4	1553	676573777777600	SB0130	6F-57-5F-7F-FF-60	1101111101011110111111111111111111111100000
AgR269	2008	Bo	Greymouth	West Coast	REA6		121.3MB	142.7MB	99.45%	76.8	1797	676573777777600	SB0130	6F-57-5F-7F-FF-60	1101111101011110111111111111111111111100000
AgR270	2002	Bo	Karamea	West Coast	REA20		123.9MB	144.7MB	99.59%	77.6	1636	676573777777600	SB0130	6F-57-5F-7F-FF-60	1101111101011110111111111111111111111100000
AgR271	2010	Bo	Kumara	West Coast	REA287	VNTR55	104.0MB	122.0MB	99.49%	65.7	1245	076573777777600	N/A	F-57-5F-7F-FF-60	0001111101011110111111111111111111111100000
AgR272	2010	Bo	LittleWanganui	West Coast	REA11	VNTR53	103.4MB	121.3MB	99.56%	65.4	1242	676573777777600	SB0130	6F-57-5F-7F-FF-60	1101111101011110111111111111111111111100000
AgR273	2007	Bo	Karamea	West Coast	REA21		123.9MB	143.3MB	99.68%	77.3	1621	676573777777600	SB0130	6F-57-5F-7F-FF-60	1101111101011110111111111111111111111100000
AgR274	2006	Bo	Dobson	West Coast	REA287	VNTR54	111.5MB	131.6MB	99.53%	70.4	1526	076573777777600	N/A	F-57-5F-7F-FF-60	0001111101011110111111111111111111111100000
AgR275	2007	Bo	Hokitika	West Coast	REA21		107.4MB	125.9MB	99.52%	66.5	1310	676573777777600	SB0130	6F-57-5F-7F-FF-60	1101111101011110111111111111111111111100000
AgR276	2005	Bo	Karamea	West Coast	REA21		129.7MB	149.2MB	99.56%	82.4	1916	676573777777600	SB0130	6F-57-5F-7F-FF-60	1101111101011110111111111111111111111100000
AgR277	2006	Pi	AshleyBuffer	Canterbury	REA62		425.4MB	433.4MB	99.73%	222.6	96929	676573777776200	SB1504	6F-57-5F-7F-FE-20	1101111101011110111111111111111111100100000
AgR278	2002	Fel	MolesworthStn	Marlborough	REA62		432.8MB	442.1MB	99.73%	227.0	99575	676573777776200	SB1504	6F-57-5F-7F-FE-20	1101111101011110111111111111111111100100000
AgR281	1992	Po	Ahaura	West Coast	REA27		140.0MB	161.0MB	99.69%	92.1	2139	676573777777600	SB0130	6F-57-5F-7F-FF-60	1101111101011110111111111111111111111100000
AgR282	2004	Pi	Inangahua	West Coast	REA21		133.6MB	154.7MB	99.72%	85.9	1760	676573777777600	SB0130	6F-57-5F-7F-FF-60	1101111101011110111111111111111111111100000
AgR283	1999	Po	Ahaura	West Coast	REA27		116.4MB	134.7MB	99.70%	74.7	1352	676573777777600	SB0130	6F-57-5F-7F-FF-60	1101111101011110111111111111111111111100000
AgR284	2001	Bo	Karamea	West Coast	REA12		137.9MB	157.3MB	99.59%	88.0	2060	676573777777600	SB0130	6F-57-5F-7F-FF-60	1101111101011110111111111111111111111100000
AgR285	2010	Bo	Westport	West Coast	REA21	VNTR35	129.6MB	150.6MB	99.72%	84.6	1874	676573777777600	SB0130	6F-57-5F-7F-FF-60	1101111101011110111111111111111111111100000
AgR288	2011	Bo	Hokitika	West Coast	REA1	VNTR59	133.6MB	154.8MB	99.54%	84.7	1911	676573777777600	SB0130	6F-57-5F-7F-FF-60	1101111101011110111111111111111111111100000
AgR290	1985	Po	Greymouth	West Coast	REA1		166.1MB	195.7MB	99.58%	106.1	2772	676573777777600	SB0130	6F-57-5F-7F-FF-60	1101111101011110111111111111111111111100000
AgR291	1999	Po	Ahaura	West Coast	REA34		113.0MB	133.7MB	99.60%	71.8	1386	676573777777600	SB0130	6F-57-5F-7F-FF-60	1101111101011110111111111111111111111100000
AgR292	1984	Po	FallsCreek	West Coast	REA21		139.9MB	165.7MB	99.71%	88.6	2153	676573777777600	SB0130	6F-57-5F-7F-FF-60	1101111101011110111111111111111111111100000
AgR294	1992	Po	Ahaura	West Coast	REA27		165.0MB	192.4MB	99.72%	106.3	2679	676573777777600	SB0130	6F-57-5F-7F-FF-60	1101111101011110111111111111111111111100000
AgR295	2008	Bo	Ahaura	West Coast	REA21		133.1MB	158.7MB	99.69%	83.9	2006	676573777777600	SB0130	6F-57-5F-7F-FF-60	1101111101011110111111111111111111111100000
AgR296	2006	Po	Karamea	West Coast	REA12		135.1MB	159.9MB	99.57%	85.1	2114	676573777777600	SB0130	6F-57-5F-7F-FF-60	1101111101011110111111111111111111111100000
AgR297	2009	Bo	Hokitika	West Coast	REA6		114.0MB	132.4MB	99.49%	70.3	1443	676573777777600	SB0130	6F-57-5F-7F-FF-60	1101111101011110111111111111111111111100000
AgR299	2010	Bo	Whataroa	West Coast	REA316	VNTR67	132.6MB	155.5MB	99.64%	81.8	1995	602573777777600	SB1446	60-57-5F-7F-FF-60	1100000101011110111111111111111111111100000
AgR300	1992	Po	Ahaura	West Coast	REA27		132.8MB	154.9MB	99.70%	84.6	1695	676573777777600	SB0130	6F-57-5F-7F-FF-60	1101111101011110111111111111111111111100000
AgR301	2004	Bo	Inangahua	West Coast	REA21		124.2MB	145.4MB	99.68%	78.2	1577	676573777777600	SB0130	6F-57-5F-7F-FF-60	1101111101011110111111111111111111111100000
AgR302	2007	Bo	Hokitika	West Coast	REA6		129.3MB	151.2MB	99.56%	80.0	1899	676573777777600	SB0130	6F-57-5F-7F-FF-60	1101111101011110111111111111111111111100000
AgR304	1984	Po	Buller	West Coast	REA11		109.3MB	127.9MB	99.56%	65.1	1538	676573777777600	SB0130	6F-57-5F-7F-FF-60	1101111101011110111111111111111111111100000
AgR305	2008	Bo	Hawarden	North Canterbury	REA62		133.6MB	154.5MB	99.67%	82.3	1842	676573777776200	SB1504	6F-57-5F-7F-FE-20	1101111101011110111111111111111111100100000
AgR306	2006	Po	Greymouth	West Coast	REA6		88.7MB	103.1MB	99.49%	52.2	1062	676573777777600	SB0130	6F-57-5F-7F-FF-60	1101111101011110111111111111111111111100000
AgR308	2009	Bo	Kumara	West Coast	REA306		111.4MB	129.1MB	99.47%	66.3	1720	676573777777600	SB0130	6F-57-5F-7F-FF-60	1101111101011110111111111111111111111100000
AgR309	2008	Bo	Kaikouraoura	Kaikoura	REA62		104.7MB	123.4MB	99.67%	64.3	1356	676573777776200	SB1504	6F-57-5F-7F-FE-20	1101111101011110111111111111111111100100000
AgR310	2007	Bo	Kaikouraoura	Kaikoura	REA62		107.4MB	125.9MB	99.63%	66.1	1345	676573777776200	SB1504	6F-57-5F-7F-FE-20	1101111101011110111111111111111111100100000
AgR313	2003	Bo	Kokatahi	West Coast	REA9		131.1MB	153.7MB	99.55%	78.2	2195	676573777777600	SB0130	6F-57-5F-7F-FF-60	1101111101011110111111111111111111111100000
AgR314	2003	Bo	MolesworthStn	Marlborough	REA62		129.0MB	150.5MB	99.66%	79.1	1824	676573777776200	SB1504	6F-57-5F-7F-FE-20	1101111101011110111111111111111111100100000
AgR315	2006	Bo	Greymouth	West Coast	REA6		110.2MB	127.9MB	99.48%	67.8	1241	676573777777600	SB0130	6F-57-5F-7F-FF-60	1101111101011110111111111111111111111100000
AgR316	2006	Bo	Arahura	West Coast	REA6		109.3MB	128.0MB	99.52%	67.1	1346	676573777777600	SB0130	6F-57-5F-7F-FF-60	1101111101011110111111111111111111111100000
AgR317	2005	Po	Taramakau	West Coast	REA9	VNTR59	109.6MB	128.5MB	99.58%	67.6	1409	676573777777600	SB0130	6F-57-5F-7F-FF-60	1101111101011110111111111111111111111100000
AgR401	2011	Pi	MtOakden	Canterbury	REA19	VNTR43	243.7MB	276.9MB	99.69%	158.0	10124	676573777777600	SB0130	6F-57-5F-7F-FF-60	1101111101011110111111111111111111111100000
AgR402	2011	Po	MtAlgidus	Canterbury	REA19	VNTR43	356.9MB	410.0MB	99.72%	227.2	19007	676573777777600	SB0130	6F-57-5F-7F-FF-60	1101111101011110111111111111111111111100000
AgR403	2007	Pi	Otaki	WLNTN	REA19	VNTR74	256.2MB	296.6MB	99.73%	165.1	15022	676573777777600	SB0130	6F-57-5F-7F-FF-60	1101111101011110111111111111111111111100000
AgR405	2004	Bo	Whataroa	West Coast	REA19	VNTR43	214.6MB	247.4MB	99.74%	137.9	10997	676573777777600	SB0130	6F-57-5F-7F-FF-60	1101111101011110111111111111111111111100000
AgR408	2011	Bo	MtAlgidus	Canterbury	REA19	VNTR43	288.2MB	330.3MB	99.70%	186.6	17943	676573777777600	SB0130	6F-57-5F-7F-FF-60	1101111101011110111111111111111111111100000
AgR411	1988	Ce	Mackenzie	Mackenzie Country	REA19	VNTR43	316.1MB	368.6MB	99.73%	203.5	14699	676573777777600	SB0130	6F-57-5F-7F-FF-60	1101111101011110111111111111111111111100000
AgR412	2011	Bo	Patetonga	Waikato	REA161	VNTR2	317.3MB	362.6MB	99.74%	205.7	16372	664073777777600	SB0140	6D-3-5F-7F-FF-60	1101101000001110111111111111111111111100000
AgR413	2011	Po	Hatepe	Taupo	REA115	VNTR2	298.1MB	345.5MB	99.98%	190.1	19259	664073777777600	SB0140	6D-3-5F-7F-FF-60	1101101000001110111111111111111111111100000
AgR414	1994	Bo	TeAroha	Waikato	REA115	VNTR2	352.9MB	409.3MB	99.99%	225.6	30953	664073777777600	SB0140	6D-3-5F-7F-FF-60	1101101000001110111111111111111111111100000
AgR415	1997	Fe	Patetonga	Waikato	REA151	VNTR44	236.6MB	269.8MB	99.99%	154.4	11153	664073777777600	SB0140	6D-3-5F-7F-FF-60	1101101000001110111111111111111111111100000
AgR416	2007	Bo	Patetonga	Waikato	REA161	VNTR2	386.3MB	435.7MB	99.82%	246.3	32270	664073777777600	SB0140	6D-3-5F-7F-FF-60	1101101000001110111111111111111111111100000
AgR417	1948	Bo	PPDsource	UK	AN5		372.1MB	420.7MB	99.71%	237.9	21117	656473737777600	SB0268	6B-53-5F-3F-FF-60	1101011101001110111110111111111111111100000
AgR419	1985	Po	Whataroa	West Coast	REA19	VNTR43	454.1MB	517.4MB	99.70%	295.3	30644	676573777777600	SB0130	6F-57-5F-7F-FF-60	1101111101011110111111111111111111111100000
AgR420	2004	Bo	Patetonga	Waikato	REA151	VNTR2	341.3MB	391.2MB	99.75%	220.4	15874	664073777777600	SB0140	6D-3-5F-7F-FF-60	1101101000001110111111111111111111111100000
AgR421	2010	Bo	Taramakau	West Coast	REA299	VNTR43	403.3MB	463.4MB	99.75%	261.0	25654	676573777747600	SB2044	6F-57-5F-7F-E7-60	1101111101011110111111111111111001111100000
AgR501	2013	Bo	TeAroha	Waikato			279.7MB	344.9MB	99.99%	196.1	12830	664073777777600	SB0140	6D-3-5F-7F-FF-60	1101101000001110111111111111111111111100000
AgR502	1999	Pi	Stoke	Nelson	REA91	VNTR21	168.0MB	187.0MB	99.73%	109.4	3414	676573777777600	SB0130	6F-57-5F-7F-FF-60	1101111101011110111111111111111111111100000
AgR503	2002	Fe	Southlandbuffer3	Southland	REA171	VNTR19	207.7MB	229.5MB	99.70%	138.0	4973	676573777776200	SB1504	6F-57-5F-7F-FE-20	1101111101011110111111111111111111100100000
AgR504	2005	Pi	Tasman	Nelson	REA91	VNTR21	193.1MB	214.6MB	99.65%	126.1	4754	676573777777600	SB0130	6F-57-5F-7F-FF-60	1101111101011110111111111111111111111100000
AgR505	2013	Bo	Otautau	Southland		VNTR19	234.5MB	262.3MB	99.67%	152.2	6553	676573777776200	SB1504	6F-57-5F-7F-FE-20	1101111101011110111111111111111111100100000
AgR507	1998	Bo	Otautau	Southland	REA171	VNTR19	239.4MB	265.5MB	99.69%	157.6	6994	676573777776200	SB1504	6F-57-5F-7F-FE-20	1101111101011110111111111111111111100100000
AgR508	2013	Bo	Waiuku	Waikato		VNTR2	247.8MB	274.4MB	99.86%	163.7	7424	664073777777600	SB0140	6D-3-5F-7F-FF-60	1101101000001110111111111111111111111100000
AgR509	2009	Bo	Otorohanga	Waikato	REA115	VNTR109	430.6MB	438.3MB	99.79%	225.6	100234	664073777777600	SB0140	6D-3-5F-7F-FF-60	1101101000001110111111111111111111111100000
AgR510	1999	Bo	Otautau	Southland	REA209	VNTR19	252.1MB	280.5MB	99.60%	167.9	7346	676573777776200	SB1504	6F-57-5F-7F-FE-20	1101111101011110111111111111111111100100000
AgR511	2009	Bo	Opunake	Taranaki	REA20	VNTR48	240.5MB	264.3MB	99.64%	159.6	5985	676573777777600	SB0130	6F-57-5F-7F-FF-60	1101111101011110111111111111111111111100000
AgR512	2002	Bo	Inglewood	Taranaki	REA20	VNTR34	288.7MB	329.9MB	99.63%	190.3	10123	676573777777600	SB0130	6F-57-5F-7F-FF-60	1101111101011110111111111111111111111100000
AgR513	2009	Bo	Otorohanga	Waikato	REA115	VNTR109	443.8MB	452.0MB	99.79%	233.2	104858	664073777777600	SB0140	6D-3-5F-7F-FF-60	1101101000001110111111111111111111111100000
AgR514	2002	Bo	Lumsden	Southland	REA171	VNTR19	212.9MB	236.6MB	99.55%	139.9	5757	676573777776200	SB1504	6F-57-5F-7F-FE-20	1101111101011110111111111111111111100100000
AgR515	2006	Bo	Otorohanga	Waikato	REA179		424.1MB	432.0MB	99.99%	222.9	100497	664073777777600	SB0140	6D-3-5F-7F-FF-60	1101101000001110111111111111111111111100000
AgR516	2009	Bo	Opunake	Taranaki	REA20	VNTR48	230.3MB	253.3MB	99.67%	152.2	6065	676573777777600	SB0130	6F-57-5F-7F-FF-60	1101111101011110111111111111111111111100000
AgR517	2013	Fe	Opio	Southland		VNTR19	233.8MB	259.5MB	99.43%	155.5	5224	676573777776200	SB1504	6F-57-5F-7F-FE-20	1101111101011110111111111111111111100100000
AgR518	2013	Bo	TeAroha	Waikato		VNTR2	259.7MB	312.9MB	99.84%	178.8	8955	664073777777600	SB0140	6D-3-5F-7F-FF-60	1101101000001110111111111111111111111100000
AgR519	2009	Bo	Opunake	Taranaki	REA20	VNTR48	379.6MB	447.6MB	99.64%	260.0	13626	676573777777600	SB0130	6F-57-5F-7F-FF-60	1101111101011110111111111111111111111100000
AgR520	2006	Bo	Otorohanga	Waikato	REA115	VNTR2	405.6MB	414.7MB	99.99%	212.4	98975	664073777777600	SB0140	6D-3-5F-7F-FF-60	1101101000001110111111111111111111111100000
AgR521	2013	Bo	Otautau	Southland		VNTR19	424.6MB	539.1MB	99.63%	291.7	21262	676573777776200	SB1504	6F-57-5F-7F-FE-20	1101111101011110111111111111111111100100000
AgR523	2013	Bo	Inglewood	Taranaki		VNTR21	150.2MB	188.1MB	99.22%	101.0	4371	676573777777600	SB0130	6F-57-5F-7F-FF-60	1101111101011110111111111111111111111100000
AgR524	2008	Bo	Waiuku	Waikato	REA115	VNTR2	217.6MB	256.0MB	99.52%	150.5	7504	664073777777600	SB0140	6D-3-5F-7F-FF-60	1101101000001110111111111111111111111100000
AgR525	2013	Bo	Pukekohe	Waikato		VNTR2	203.3MB	249.7MB	99.46%	138.8	5642	664073777777600	SB0140	6D-3-5F-7F-FF-60	1101101000001110111111111111111111111100000
AgR526	2013	Fe	Letham	Southland		VNTR19	235.0MB	276.5MB	99.26%	162.6	8208	676573777776200	SB1504	6F-57-5F-7F-FE-20	1101111101011110111111111111111111100100000
AgR527	2008	Bo	Opunake	Taranaki	REA20	VNTR48	181.9MB	227.4MB	99.07%	124.0	7360	676573777777600	SB0130	6F-57-5F-7F-FF-60	1101111101011110111111111111111111111100000
AgR528	2012	Po	Karamea	West Coast		VNTR21	204.8MB	258.2MB	99.31%	138.5	6517	676573777777600	SB0130	6F-57-5F-7F-FF-60	1101111101011110111111111111111111111100000
AgR529	2013	Bo	Opunake	Taranaki		VNTR48	167.3MB	196.6MB	99.34%	115.6	5091	676573777777600	SB0130	6F-57-5F-7F-FF-60	1101111101011110111111111111111111111100000
AgR530	2011	Bo	Avondale	Southland	REA171	VNTR19	240.1MB	282.6MB	99.55%	164.7	10566	676573777776200	SB1504	6F-57-5F-7F-FE-20	1101111101011110111111111111111111100100000
AgR531	2012	Po	Karamea	West Coast		VNTR21	252.1MB	287.0MB	99.75%	178.9	8285	676573777777600	SB0130	6F-57-5F-7F-FF-60	1101111101011110111111111111111111111100000
AgR532	2011	Bo	Oamaru	Otago	REA171	VNTR19	255.4MB	297.0MB	99.19%	181.2	8523	676573777776200	SB1504	6F-57-5F-7F-FE-20	1101111101011110111111111111111111100100000
AgR533	2010	Bo	Awhitu	Waikato	REA115	VNTR2	184.3MB	215.2MB	99.59%	129.5	4576	664073777777600	SB0140	6D-3-5F-7F-FF-60	1101101000001110111111111111111111111100000
AgR534	2010	Bo	Aria	Waikato	REA115	VNTR4	245.7MB	280.5MB	99.71%	173.6	7390	664073777777600	SB0140	6D-3-5F-7F-FF-60	1101101000001110111111111111111111111100000
AgR535	2010	Bo	Pukehina	Bay of Plenty	REA115	VNTR2	219.4MB	247.6MB	99.42%	156.1	6110	664073777777600	SB0140	6D-3-5F-7F-FF-60	1101101000001110111111111111111111111100000
AgR536	2013	Bo	Inglewood	Taranaki		VNTR21	210.4MB	243.5MB	99.30%	149.7	5520	676573777777600	SB0130	6F-57-5F-7F-FF-60	1101111101011110111111111111111111111100000
AgR537	2013	Bo	Opunake	Taranaki		VNTR48	213.2MB	248.6MB	99.41%	150.4	6016	676573777777600	SB0130	6F-57-5F-7F-FF-60	1101111101011110111111111111111111111100000
AgR538	2013	Bo	Opunake	Taranaki		VNTR48	238.3MB	262.9MB	99.56%	169.5	7898	676573777777600	SB0130	6F-57-5F-7F-FF-60	1101111101011110111111111111111111111100000
AgR540	2007	Bo	Morrinsville	Waikato	REA115	VNTR2	213.1MB	248.1MB	99.63%	150.5	5997	664073777777600	SB0140	6D-3-5F-7F-FF-60	1101101000001110111111111111111111111100000
AgR541	2013	Bo	Kaitaia	Northland		VNTR109	409.6MB	417.2MB	99.80%	214.8	92766	664073777777600	SB0140	6D-3-5F-7F-FF-60	1101101000001110111111111111111111111100000
AgR542	2013	Bo	Inglewood	Taranaki		VNTR21	228.2MB	251.8MB	99.37%	163.0	7828	676573777777600	SB0130	6F-57-5F-7F-FF-60	1101111101011110111111111111111111111100000
AgR543	2013	Bo	TeAroha	Waikato			250.3MB	281.6MB	99.89%	182.6	8858	664073777777600	SB0140	6D-3-5F-7F-FF-60	1101101000001110111111111111111111111100000
AgR544	2013	Bo	Kaikouraohe	Northland		VNTR109	421.6MB	428.7MB	99.79%	220.5	98342	664073777777600	SB0140	6D-3-5F-7F-FF-60	1101101000001110111111111111111111111100000
AgR545	2013	Bo	Kaitaia	Northland		VNTR109	445.7MB	453.6MB	99.78%	234.2	103293	664073777777600	SB0140	6D-3-5F-7F-FF-60	1101101000001110111111111111111111111100000
AgR546	2013	Bo	Waiuku	Waikato		VNTR2	179.0MB	201.6MB	99.86%	129.2	4594	664073777777600	SB0140	6D-3-5F-7F-FF-60	1101101000001110111111111111111111111100000
AgR547	2013	Bo	Inglewood	Taranaki		VNTR21	280.4MB	321.6MB	99.63%	200.7	9878	676573777777600	SB0130	6F-57-5F-7F-FF-60	1101111101011110111111111111111111111100000
AgR548	2013	Bo	Waiuku	Waikato		VNTR2	258.2MB	296.4MB	99.71%	189.3	10709	664073777777600	SB0140	6D-3-5F-7F-FF-60	1101101000001110111111111111111111111100000
AgR549	2013	Bo	Opunake	Taranaki		VNTR48	194.3MB	221.9MB	99.52%	142.0	5407	676573777777600	SB0130	6F-57-5F-7F-FF-60	1101111101011110111111111111111111111100000
AgR550	2013	Bo	Inglewood	Taranaki		VNTR21	252.0MB	286.8MB	99.47%	184.8	9686	676573777777600	SB0130	6F-57-5F-7F-FF-60	1101111101011110111111111111111111111100000
AgR551	2013	Bo	Kaitaia	Northland		VNTR109	420.9MB	430.4MB	99.78%	220.9	94775	664073777777600	SB0140	6D-3-5F-7F-FF-60	1101101000001110111111111111111111111100000
AgR552	2013	Bo	Karamea	West Coast		VNTR21	270.4MB	314.0MB	99.52%	194.9	8144	676573777777600	SB0130	6F-57-5F-7F-FF-60	1101111101011110111111111111111111111100000
AgR553	2013	Bo	Karamea	West Coast		VNTR21	254.0MB	287.1MB	99.38%	184.8	8284	676573777777600	SB0130	6F-57-5F-7F-FF-60	1101111101011110111111111111111111111100000
AgR554	2007	Bo	Turua	Waikato	REA115	VNTR2	218.7MB	251.3MB	99.63%	159.4	7232	664073777777600	SB0140	6D-3-5F-7F-FF-60	1101101000001110111111111111111111111100000
AgR556	1999	Fe	Opio	Southland	REA209	VNTR19	230.2MB	264.9MB	99.25%	166.5	6699	676573777776200	SB1504	6F-57-5F-7F-FE-20	1101111101011110111111111111111111100100000
AgR557	2001	Bo	Otautau	Southland	REA209	VNTR19	195.3MB	220.6MB	99.43%	140.4	5134	676573777776200	SB1504	6F-57-5F-7F-FE-20	1101111101011110111111111111111111100100000
AgR600	2009	Cyn	454	Mcaprae			254.9MB	293.4MB	99.67%	180.4	75085	000003777377600	SB1622	0-0-1F-7E-FF-60	0000000000000000111111111110111111111100000
AgR701	2001	Bo	Wanaka	Otago	REA187	VNTR24	47.4MB	55.3MB	97.72%	32.3	614	664073777777600	SB0140	6D-3-5F-7F-FF-60	1101101000001110111111111111111111111100000
AgR702	1997	Ce	Wanaka	Otago	REA187		64.2MB	75.0MB	98.10%	43.3	880	664073777777600	SB0140	6D-3-5F-7F-FF-60	1101101000001110111111111111111111111100000
AgR703	1998	Fe	Taieri	Otago	REA188	VNTR28	65.0MB	79.0MB	98.79%	42.4	2044	664073777777600	SB0140	6D-3-5F-7F-FF-60	1101101000001110111111111111111111111100000
AgR704	1998	Ce	Wanaka	Otago	REA187		57.6MB	66.8MB	98.47%	36.3	1463	664073777777600	SB0140	6D-3-5F-7F-FF-60	1101101000001110111111111111111111111100000
AgR705	1990	Po	Mermere	Waikato	REA151		105.1MB	128.1MB	99.79%	73.5	6856	664073777777600	SB0140	6D-3-5F-7F-FF-60	1101101000001110111111111111111111111100000
AgR706	1990	Po	Mermere	Waikato	REA151		161.5MB	194.7MB	99.80%	114.3	13604	664073777777600	SB0140	6D-3-5F-7F-FF-60	1101101000001110111111111111111111111100000
AgR707	1999	Fe	NorthOtago	Otago	REA187		59.8MB	70.1MB	98.96%	40.1	889	664073777777600	SB0140	6D-3-5F-7F-FF-60	1101101000001110111111111111111111111100000
AgR708	1996	Fe	KopuataiSwamp	Waikato			50.0MB	58.1MB	98.17%	34.2	629	664073777777600	SB0140	6D-3-5F-7F-FF-60	1101101000001110111111111111111111111100000
AgR709	1997	Fe	Tahuna	Waikato	REA151		66.9MB	78.9MB	99.30%	45.3	812	664073777777600	SB0140	6D-3-5F-7F-FF-60	1101101000001110111111111111111111111100000
AgR710	1998	Po	Taupo	Taupo	REA115		64.8MB	75.7MB	98.42%	44.1	1142	664073777777600	SB0140	6D-3-5F-7F-FF-60	1101101000001110111111111111111111111100000
AgR711	2006	Bo	Patea	Taranaki	REA19		108.9MB	126.6MB	99.81%	61.1	11525	676573777777600	SB0130	6F-57-5F-7F-FF-60	1101111101011110111111111111111111111100000
AgR712	2007	Bo	Eltham	Taranaki	REA21	VNTR34	126.7MB	151.4MB	99.79%	86.1	11726	676573777777600	SB0130	6F-57-5F-7F-FF-60	1101111101011110111111111111111111111100000
AgR713	2009	Ce	Wanaka	Otago	REA187		50.1MB	58.9MB	98.17%	34.7	810	664073777777600	SB0140	6D-3-5F-7F-FF-60	1101101000001110111111111111111111111100000
AgR714	2009	Ce	Wanaka	Otago	REA187		164.4MB	201.0MB	99.63%	119.5	5604	664073777777600	SB0140	6D-3-5F-7F-FF-60	1101101000001110111111111111111111111100000
AgR715	2009	Bo	Opunake	Taranaki	REA81	VNTR74	112.3MB	136.1MB	99.49%	74.3	14619	676573775777600	N/A	6F-57-5F-7B-FF-60	1101111101011110111111111011111111111100000
AgR716	2009	Bo	Hawera	Taranaki	REA19	VNTR113	120.9MB	144.6MB	99.78%	80.9	15801	676573777777600	SB0130	6F-57-5F-7F-FF-60	1101111101011110111111111111111111111100000
AgR717	2009	Fe	Whangamarino	Waikato	REA256	VNTR44	164.0MB	198.7MB	99.94%	120.8	4465	664073777777600	SB0140	6D-3-5F-7F-FF-60	1101101000001110111111111111111111111100000
AgR718	2009	Fe	WhangamarinoSwamp	Waikato	REA263	VNTR44	61.3MB	72.4MB	98.23%	41.9	1039	664073777777600	SB0140	6D-3-5F-7F-FF-60	1101101000001110111111111111111111111100000
AgR719	2009	Bo	Westport	West Coast	REA12	VNTR53	51.9MB	60.2MB	98.00%	34.3	1628	676573777777600	SB0130	6F-57-5F-7F-FF-60	1101111101011110111111111111111111111100000
AgR720	2009	Bo	Kaitaia	Northland	REA115		148.9MB	177.1MB	100.00%	100.3	12326	664073777777600	SB0140	6D-3-5F-7F-FF-60	1101101000001110111111111111111111111100000
AgR721	2010	Po	Mikonui	West Coast	REA6	VNTR59	56.8MB	66.3MB	97.94%	38.3	1353	676573777777600	SB0130	6F-57-5F-7F-FF-60	1101111101011110111111111111111111111100000
AgR722	2010	Bo	Westport	West Coast	REA12	VNTR53	68.1MB	79.9MB	98.16%	45.3	2279	676573777777600	SB0130	6F-57-5F-7F-FF-60	1101111101011110111111111111111111111100000
AgR723	2010	Bo	Kumara	West Coast	REA306	VNTR59	52.9MB	62.0MB	98.04%	36.0	772	676573777777600	SB0130	6F-57-5F-7F-FF-60	1101111101011110111111111111111111111100000
AgR725	2012	Bo	Wanaka	Otago			131.3MB	158.5MB	99.44%	94.5	2924	664073777777600	SB0140	6D-3-5F-7F-FF-60	1101101000001110111111111111111111111100000
AgR726	2012	Fe	SistersPeaks	Southland		VNTR28	56.0MB	65.9MB	98.54%	37.6	788	664073777777600	SB0140	6D-3-5F-7F-FF-60	1101101000001110111111111111111111111100000
AgR727	2012	Pi	NorthTaupo	Taupo		VNTR2	57.7MB	67.2MB	98.46%	38.9	870	664073777777600	SB0140	6D-3-5F-7F-FF-60	1101101000001110111111111111111111111100000
AgR728	2012	Bo	Inglewood	Taranaki		VNTR21	156.7MB	187.3MB	99.76%	101.1	24629	676573777777600	SB0130	6F-57-5F-7F-FF-60	1101111101011110111111111111111111111100000
AgR729	2013	Ce	Wanaka	Otago		VNTR24	73.0MB	88.5MB	98.89%	46.7	2916	664073777777600	SB0140	6D-3-5F-7F-FF-60	1101101000001110111111111111111111111100000
AgR730	2013	Pi	Hauturu	Waikato		VNTR2	70.2MB	84.8MB	98.96%	45.8	1759	664073777777600	SB0140	6D-3-5F-7F-FF-60	1101101000001110111111111111111111111100000
AgR731	2013	Bo	Kowhitirangi	West Coast			54.5MB	65.9MB	98.50%	35.0	1300	676573777777600	SB0130	6F-57-5F-7F-FF-60	1101111101011110111111111111111111111100000
AgR732	2013	Bo	HariHari	West Coast		VNTR53	63.5MB	73.8MB	98.66%	42.2	1071	676573777777600	SB0130	6F-57-5F-7F-FF-60	1101111101011110111111111111111111111100000
AgR733	2013	Bo	Ikamatua	West Coast		VNTR53	72.0MB	84.0MB	98.88%	48.0	1150	676573777777600	SB0130	6F-57-5F-7F-FF-60	1101111101011110111111111111111111111100000
AgR734	2014	Bo	Teviot	Otago		VNTR28	57.5MB	66.9MB	98.88%	38.3	860	664073777777600	SB0140	6D-3-5F-7F-FF-60	1101101000001110111111111111111111111100000
AgR735	2014	Bo	Ross	West Coast		VNTR59	55.5MB	64.7MB	98.76%	35.9	1504	676573777777600	SB0130	6F-57-5F-7F-FF-60	1101111101011110111111111111111111111100000
AgR737	2014	Bo	Kowhitirangi	West Coast		VNTR59	30.3MB	35.4MB	98.52%	20.1	549	676573777777600	SB0130	6F-57-5F-7F-FF-60	1101111101011110111111111111111111111100000
AgR738	2014	Bo	South Westland	West Coast		VNTR59	64.4MB	74.7MB	98.22%	42.9	2290	676573777777600	SB0130	6F-57-5F-7F-FF-60	1101111101011110111111111111111111111100000
AgR739	2014	Bo	Kowhitirangi	West Coast		VNTR59	60.2MB	70.5MB	98.29%	40.1	1913	676573777777600	SB0130	6F-57-5F-7F-FF-60	1101111101011110111111111111111111111100000
AgR740	2014	Po	Taramakau	West Coast			66.2MB	78.2MB	98.24%	44.0	1175	676573777777600	SB0130	6F-57-5F-7F-FF-60	1101111101011110111111111111111111111100000
AgR741	1990	Po	Hohonu	West Coast			97.5MB	119.5MB	99.69%	63.0	11324	676573777777600	SB0130	6F-57-5F-7F-FF-60	1101111101011110111111111111111111111100000
AgR742	2014	Po	Taramakau	West Coast			66.6MB	78.4MB	98.56%	44.9	1182	076573777777600	N/A	F-57-5F-7F-FF-60	0001111101011110111111111111111111111100000
AgR743	2014	Ce	Wanaka	Otago		VNTR24	57.8MB	68.2MB	98.93%	38.5	812	664073777777600	SB0140	6D-3-5F-7F-FF-60	1101101000001110111111111111111111111100000
AgR744	2014	Bo	South Westland	West Coast		VNTR53	72.2MB	85.5MB	98.91%	49.0	1096	676573777777600	SB0130	6F-57-5F-7F-FF-60	1101111101011110111111111111111111111100000
AgR745	2009	Bo	TeKauwhata	Waikato	REA179	VNTR44	153.0MB	186.3MB	99.71%	110.8	4405	664073777777600	SB0140	6D-3-5F-7F-FF-60	1101101000001110111111111111111111111100000
AgR746	1996	Fe	Morrinsville	Waikato			135.2MB	162.5MB	99.79%	89.2	19010	664073777777600	SB0140	6D-3-5F-7F-FF-60	1101101000001110111111111111111111111100000
AgR928	2012	Po	Orongorongo	Wellington		VNTR34	101.2MB	119.3MB	99.81%	60.7	15270	676573777777600	SB0130	6F-57-5F-7F-FF-60	1101111101011110111111111111111111111100000
AgR931	1985	Po	Orongorongo	Wellington	REA16	VNTR34	116.3MB	136.2MB	99.80%	67.6	18600	676573777777600	SB0130	6F-57-5F-7F-FF-60	1101111101011110111111111111111111111100000
AgR932	1997	Po	Orongorongo	Wellington	REA21	VNTR34	151.1MB	178.2MB	99.81%	88.4	30798	676573777777600	SB0130	6F-57-5F-7F-FF-60	1101111101011110111111111111111111111100000
AgR935	2004	Po	Orongorongo	Wellington	REA21	VNTR34	139.6MB	164.6MB	99.82%	79.4	28670	676573777777600	SB0130	6F-57-5F-7F-FF-60	1101111101011110111111111111111111111100000
AgR939	2008	Po	Orongorongo	Wellington		VNTR34	164.6MB	198.9MB	99.77%	108.3	5147	676573777777600	SB0130	6F-57-5F-7F-FF-60	1101111101011110111111111111111111111100000
AgR1264	1995	Bo	Mangatainoka	Pahiatua	REA85	VNTR36	31.6MB	32.9MB	99.53%	17.5	19635	676573777777600	SB0130	6F-57-5F-7F-FF-60	1101111101011110111111111111111111111100000
AgR1268	2009	Pi	Akatarawa	Wellington	REA47	VNTR36	37.2MB	44.4MB	99.65%	25.3	29300	676573777777600	SB0130	6F-57-5F-7F-FF-60	1101111101011110111111111111111111111100000
AgR1270	2012	Pi	Carterton	Wairarapa		VNTR36	32.6MB	38.8MB	99.60%	21.6	29062	676573777777600	SB0130	6F-57-5F-7F-FF-60	1101111101011110111111111111111111111100000
AgR1601	1999	Bo	Taihape	Taihape	REA214	VNTR10	101.4MB	114.1MB	99.76%	72.5	11483	664073777777200	SB0273	6D-3-5F-7F-FF-20	1101101000001110111111111111111111110100000
AgR1602	1994	Bo	Waipukurau	Hawks Bay	REA131	VNTR1	75.4MB	88.5MB	99.66%	54.4	8041	664073777777600	SB0140	6D-3-5F-7F-FF-60	1101101000001110111111111111111111111100000
AgR1603	2004	Fe	Ngamatea	Taihape		VNTR1	86.7MB	101.8MB	99.79%	63.5	10384	664073777777600	SB0140	6D-3-5F-7F-FF-60	1101101000001110111111111111111111111100000
AgR1604	2006	Fe	Ngamatea	Taihape	REA245	VNTR1	68.1MB	78.7MB	99.68%	47.8	7780	664073777777600	SB0140	6D-3-5F-7F-FF-60	1101101000001110111111111111111111111100000
AgR1605	2015	Bo	Waikato	Central North Island		VNTR1	108.4MB	120.6MB	99.59%	71.5	16373	664073777777600	SB0140	6D-3-5F-7F-FF-60	1101101000001110111111111111111111111100000
AgR1606	2015	Bo	Waikato	Central North Island		VNTR1	101.6MB	112.3MB	99.65%	70.9	15202	664073777777600	SB0140	6D-3-5F-7F-FF-60	1101101000001110111111111111111111111100000
AgR1607	2015	Bo	Waikato	Central North Island		VNTR1	125.5MB	136.0MB	99.73%	85.8	19221	664073777777600	SB0140	6D-3-5F-7F-FF-60	1101101000001110111111111111111111111100000
AgR1608	2015	Bo	Waikato	Central North Island		VNTR1	104.0MB	118.6MB	99.67%	75.4	14938	664073777777600	SB0140	6D-3-5F-7F-FF-60	1101101000001110111111111111111111111100000
AgR1609	2015	Bo	Waikato	Central North Island		VNTR1	110.5MB	122.1MB	99.63%	78.2	17444	664073777777600	SB0140	6D-3-5F-7F-FF-60	1101101000001110111111111111111111111100000
AgR1610	2015	Bo	Mangakino	Waikato		VNTR2	57.5MB	67.8MB	99.64%	39.0	4699	664073777777600	SB0140	6D-3-5F-7F-FF-60	1101101000001110111111111111111111111100000
AgR1611	2015	Bo	WaikiteValley	Rotorua		VNTR2	114.4MB	128.4MB	99.73%	81.8	17790	664073777777600	SB0140	6D-3-5F-7F-FF-60	1101101000001110111111111111111111111100000
AgR1612	2012	Pi	Tihoi	Taupo			125.4MB	139.9MB	99.75%	88.6	22451	664073777777600	SB0140	6D-3-5F-7F-FF-60	1101101000001110111111111111111111111100000
AgR1613	2013	Pi	Tihoi	Taupo		VNTR2	116.2MB	128.6MB	99.78%	81.2	18862	664073777777600	SB0140	6D-3-5F-7F-FF-60	1101101000001110111111111111111111111100000
AgR1614	2015	Pi	Hauhungaroa	Waikato		VNTR2	137.2MB	148.3MB	99.65%	94.4	19190	664073777777600	SB0140	6D-3-5F-7F-FF-60	1101101000001110111111111111111111111100000
AgR1615	2013	Bo	Kokatahi	West Coast		VNTR59	106.1MB	117.5MB	99.26%	75.4	14498	676573777777600	SB0130	6F-57-5F-7F-FF-60	1101111101011110111111111111111111111100000
AgR1616	2013	Bo	Kowhitirangi	West Coast		VNTR59	113.7MB	132.6MB	99.36%	78.5	15311	676573777777600	SB0130	6F-57-5F-7F-FF-60	1101111101011110111111111111111111111100000
AgR1617	2013	Bo	Kokatahi	West Coast		VNTR59	85.5MB	95.5MB	99.40%	62.7	15254	676573777777600	SB0130	6F-57-5F-7F-FF-60	1101111101011110111111111111111111111100000
AgR1618	2014	Bo	Kokatahi	West Coast		VNTR59	95.2MB	107.1MB	99.42%	70.4	17211	676573777777600	SB0130	6F-57-5F-7F-FF-60	1101111101011110111111111111111111111100000
AgR1619	2014	Bo	Kokatahi	West Coast		VNTR59	89.0MB	100.6MB	99.38%	65.4	13706	676573777777600	SB0130	6F-57-5F-7F-FF-60	1101111101011110111111111111111111111100000
AgR1622	2013	Bo	Arahura	West Coast		VNTR59	108.8MB	123.6MB	99.49%	80.7	21894	676573777777600	SB0130	6F-57-5F-7F-FF-60	1101111101011110111111111111111111111100000
AgR1623	2013	Bo	Arahura	West Coast		VNTR59	91.1MB	102.8MB	99.41%	67.6	11971	676573777777600	SB0130	6F-57-5F-7F-FF-60	1101111101011110111111111111111111111100000
AgR1624	2015	Bo	Arahura	West Coast		VNTR59	83.3MB	93.7MB	99.41%	61.6	11976	676573777777600	SB0130	6F-57-5F-7F-FF-60	1101111101011110111111111111111111111100000
AgR1625	2013	Bo	Chesterfield	West Coast		VNTR59	82.4MB	92.0MB	99.40%	60.6	8397	676573777777600	SB0130	6F-57-5F-7F-FF-60	1101111101011110111111111111111111111100000
AgR1626	2015	Ce	Harhihari	West Coast		VNTR59	90.2MB	101.8MB	99.36%	67.1	13249	676573777777600	SB0130	6F-57-5F-7F-FF-60	1101111101011110111111111111111111111100000
AgR1627	2013	Po	Rimu	West Coast		VNTR59	66.0MB	78.1MB	99.43%	48.4	8578	676573777777600	SB0130	6F-57-5F-7F-FF-60	1101111101011110111111111111111111111100000
AgR1628	2011	Bo	Ngamatea	Taihape	REA301	VNTR1	71.1MB	80.0MB	99.74%	52.1	8535	664073777777600	SB0140	6D-3-5F-7F-FF-60	1101101000001110111111111111111111111100000
AgR1629	2014	Ce	HauhungaroaStage/Tihoi	Taupo		VNTR123	73.7MB	86.4MB	99.73%	55.7	9613	664073777777600	SB0140	6D-3-5F-7F-FF-60	1101101000001110111111111111111111111100000
AgR1630	2015	Bo	Wesport	West Coast		VNTR35	53.9MB	62.6MB	99.53%	40.4	6215	676573777777600	SB0130	6F-57-5F-7F-FF-60	1101111101011110111111111111111111111100000
AgR1631	2015	Ce	Wanaka	Otago		VNTR24	89.5MB	104.9MB	99.57%	67.4	13342	664073777777600	SB0140	6D-3-5F-7F-FF-60	1101101000001110111111111111111111111100000
AgR1633	2012	Fe	Luggate	Otago		VNTR24	99.2MB	121.6MB	99.54%	74.8	12663	664073777777600	SB0140	6D-3-5F-7F-FF-60	1101101000001110111111111111111111111100000
AgR1634	2015	Bo	SawyersBay	Otago		VNTR103	94.8MB	109.2MB	99.48%	70.5	12193	664073777777600	SB0140	6D-3-5F-7F-FF-60	1101101000001110111111111111111111111100000
AgR1635	2015	Bo	Normanby	Otago		VNTR103	75.1MB	86.0MB	99.47%	55.4	12318	664073777777600	SB0140	6D-3-5F-7F-FF-60	1101101000001110111111111111111111111100000
AgR1636	2015	Bo	SawyersBay	Otago		VNTR103	47.7MB	56.1MB	99.34%	36.2	5502	664073777777600	SB0140	6D-3-5F-7F-FF-60	1101101000001110111111111111111111111100000
AgR1637	2011	Bo	Ngamatea	Taihape	REA301	VNTR1	43.4MB	49.7MB	99.62%	32.6	4107	664073777777600	SB0140	6D-3-5F-7F-FF-60	1101101000001110111111111111111111111100000
AgR1638	2015	Bo	SawyersBay	Otago		VNTR103	79.8MB	93.2MB	99.49%	60.5	11224	664073777777600	SB0140	6D-3-5F-7F-FF-60	1101101000001110111111111111111111111100000
AgR1639	2015	Ce	Waitati	Otago		VNTR103	48.5MB	57.2MB	99.41%	36.9	4378	664073777777600	SB0140	6D-3-5F-7F-FF-60	1101101000001110111111111111111111111100000
AgR1640	2014	Bo	Pongaroa	Wairarapa		VNTR2	46.6MB	54.1MB	99.56%	35.4	4032	664073777777600	SB0140	6D-3-5F-7F-FF-60	1101101000001110111111111111111111111100000
AgR1641	2015	Ce	LittleWanganui	West Coast		VNTR53	80.4MB	90.0MB	99.47%	51.7	13828	676573777777600	SB0130	6F-57-5F-7F-FF-60	1101111101011110111111111111111111111100000
AgR1642	2015	Ce	Waitati	Otago		VNTR103	55.3MB	58.0MB	99.36%	38.0	4356	664073777777600	SB0140	6D-3-5F-7F-FF-60	1101101000001110111111111111111111111100000
AgR1643	2015	Ce	Wanaka	Otago		VNTR24	55.7MB	62.7MB	99.34%	40.8	5804	664073777777600	SB0140	6D-3-5F-7F-FF-60	1101101000001110111111111111111111111100000
AgR1644	2015	Fe	BenmoreStn	South Canterbury		VNTR27	53.6MB	62.1MB	99.39%	40.0	4909	664073777777600	SB0140	6D-3-5F-7F-FF-60	1101101000001110111111111111111111111100000
AgR1645	2015	Fe	BenmoreStn	South Canterbury		VNTR27	61.7MB	68.3MB	99.39%	45.3	5878	664073777777600	SB0140	6D-3-5F-7F-FF-60	1101101000001110111111111111111111111100000
AgR1646	2015	Fe	BenmoreStn	South Canterbury		VNTR27	68.2MB	76.6MB	99.51%	50.9	7773	664073777777600	SB0140	6D-3-5F-7F-FF-60	1101101000001110111111111111111111111100000
AgR1647	2015	Fe	BenmoreStn	South Canterbury		VNTR133	62.7MB	68.4MB	99.40%	44.6	6010	664073777777600	SB0140	6D-3-5F-7F-FF-60	1101101000001110111111111111111111111100000
AgR1648	2015	Po	MtCargill	Otago		VNTR103	109.1MB	119.7MB	99.58%	78.4	20649	664073777777600	SB0140	6D-3-5F-7F-FF-60	1101101000001110111111111111111111111100000
AgR1649	2015	Po	MtCargill	Otago		VNTR103	75.8MB	84.6MB	99.59%	54.8	10467	664073777777600	SB0140	6D-3-5F-7F-FF-60	1101101000001110111111111111111111111100000
AgR1650	2015	Po	MtCargill	Otago		VNTR103	107.0MB	119.7MB	99.58%	78.7	16176	664073777777600	SB0140	6D-3-5F-7F-FF-60	1101101000001110111111111111111111111100000
AgR1651	2015	Pi	LittleWanganui	West Coast		VNTR53	95.8MB	117.1MB	99.37%	70.1	11367	676573777777600	SB0130	6F-57-5F-7F-FF-60	1101111101011110111111111111111111111100000
AgR1652	2007	Bo	Ngamatea	Taihape	REA301		100.3MB	117.5MB	99.84%	68.0	16302	664073777777600	SB0140	6D-3-5F-7F-FF-60	1101101000001110111111111111111111111100000
AgR1654	1994	Pi	Hauhungaroa	King Country	REA115		100.8MB	117.0MB	99.77%	68.1	12263	664073777477600	N/A	6D-3-5F-7F-3F-60	1101101000001110111111111111001111111100000
AgR1656	1984	Po	Taumaranui	King Country	REA177		119.4MB	139.1MB	99.82%	80.3	15798	664073777777600	SB0140	6D-3-5F-7F-FF-60	1101101000001110111111111111111111111100000
AgR1657	2015	Po	MtCargill	Otago		VNTR103	85.4MB	102.4MB	99.57%	62.0	11778	664073777777600	SB0140	6D-3-5F-7F-FF-60	1101101000001110111111111111111111111100000
AgR1658	2016	Po	MtCargill	Otago		VNTR103	116.6MB	141.6MB	99.51%	85.5	18091	664073777777600	SB0140	6D-3-5F-7F-FF-60	1101101000001110111111111111111111111100000
AgR1659	2016	Po	MtCargill	Otago		VNTR103	74.3MB	84.4MB	99.52%	54.7	7956	664073777777600	SB0140	6D-3-5F-7F-FF-60	1101101000001110111111111111111111111100000
AgR1660	2016	Bo	Ranfurly	Otago		VNTR28	98.4MB	111.7MB	99.55%	71.5	11068	664073777777600	SB0140	6D-3-5F-7F-FF-60	1101101000001110111111111111111111111100000
AgR1661	2016	Bo	MtCargill	Otago		VNTR103	79.7MB	91.4MB	99.53%	58.6	8925	664073777777600	SB0140	6D-3-5F-7F-FF-60	1101101000001110111111111111111111111100000
AgR1662	1994	Po	Abbotsford	Otago		VNTR7	86.1MB	97.7MB	99.81%	62.9	11730	664073777777600	SB0140	6D-3-5F-7F-FF-60	1101101000001110111111111111111111111100000
AgR1663	2010	Fe	NorthTaieri	Otago			75.0MB	86.3MB	99.53%	54.7	8221	664073777777600	SB0140	6D-3-5F-7F-FF-60	1101101000001110111111111111111111111100000
AgR1664	2012	Bo	Culverden	Canterbury		VNTR103	58.0MB	67.8MB	99.36%	42.2	4457	664073777777600	SB0140	6D-3-5F-7F-FF-60	1101101000001110111111111111111111111100000
AgR1665	2012	Bo	Wiakouaiti	Otago		VNTR104	151.5MB	176.0MB	99.63%	105.3	25797	664073777777600	SB0140	6D-3-5F-7F-FF-60	1101101000001110111111111111111111111100000
AgR1666	2010	Bo	Waikouaiti	Otago	REA197	VNTR62	93.9MB	107.8MB	99.49%	68.8	10224	664073777777600	SB0140	6D-3-5F-7F-FF-60	1101101000001110111111111111111111111100000
AgR1668	2010	Bo	ClarksJunction	Otago	REA188	VNTR28	85.0MB	102.1MB	99.60%	61.2	10642	664073777777600	SB0140	6D-3-5F-7F-FF-60	1101101000001110111111111111111111111100000
AgR1669	2010	Bo	LeeFlat	Otago	REA187	VNTR27	94.1MB	116.3MB	99.35%	68.1	10115	664073777777600	SB0140	6D-3-5F-7F-FF-60	1101101000001110111111111111111111111100000
AgR1670	2008	Ce	Outram	Otago	REA298	VNTR26	100.4MB	124.2MB	99.57%	72.5	13087	664073777777600	SB0140	6D-3-5F-7F-FF-60	1101101000001110111111111111111111111100000
AgR1671	1997	Bo	Mosgiel	Otago	REA224	VNTR26	45.5MB	51.9MB	99.43%	33.7	4321	664073777777600	SB0140	6D-3-5F-7F-FF-60	1101101000001110111111111111111111111100000
AgR1672	2007	Fe	Loganburn	Otago	REA198		47.1MB	54.3MB	99.35%	35.0	3753	664073777777600	SB0140	6D-3-5F-7F-FF-60	1101101000001110111111111111111111111100000
AgR1673	1999	Po	Hampden	Otago	REA187		42.9MB	48.6MB	99.46%	31.5	4428	664073777777600	SB0140	6D-3-5F-7F-FF-60	1101101000001110111111111111111111111100000
AgR1674	2007	Pi	Gwavas	East Coast	REA115	VNTR132	59.4MB	69.5MB	99.54%	44.0	7098	664073777777600	SB0140	6D-3-5F-7F-FF-60	1101101000001110111111111111111111111100000
AgR1676	2004	Ce	SouthernUreweras	Taupo	REA21	VNTR34	71.6MB	83.5MB	99.57%	53.8	10421	676573777777600	SB0130	6F-57-5F-7F-FF-60	1101111101011110111111111111111111111100000
AgR1677	2015	Bo	Karamea	West Coast		VNTR134	49.6MB	58.0MB	99.38%	36.8	4471	676573377777600	SB1897	6F-57-5B-7F-FF-60	1101111101011110110111111111111111111100000
AgR1678	2015	Ce	Hamner/Hurunui	North Canterbury		VNTR20	84.1MB	93.6MB	99.58%	55.6	10989	676573777776200	SB1504	6F-57-5F-7F-FE-20	1101111101011110111111111111111111100100000
AgR1679	2015	Ce	LewisPass	Canterbury		VNTR56	55.2MB	65.9MB	99.23%	41.1	4588	676573777776200	SB1504	6F-57-5F-7F-FE-20	1101111101011110111111111111111111100100000
AgR1684	2016	Bo	MtAlgidus	Canterbury		VNTR43	74.2MB	87.1MB	99.50%	55.9	9494	676573777777600	SB0130	6F-57-5F-7F-FF-60	1101111101011110111111111111111111111100000
AgR1685	2016	Bo	Kaikouraoura	North Canterbury		VNTR20	48.8MB	57.2MB	99.40%	36.3	5829	676573777776200	SB1504	6F-57-5F-7F-FE-20	1101111101011110111111111111111111100100000
AgR1686	2016	Bo	Dobson	West Coast		VNTR35	62.6MB	74.4MB	99.46%	46.9	6924	676573777777600	SB0130	6F-57-5F-7F-FF-60	1101111101011110111111111111111111111100000
AgR1687	2016	Bo	Karamea	West Coast		VNTR21	108.9MB	130.6MB	99.57%	72.8	17879	676573777777600	SB0130	6F-57-5F-7F-FF-60	1101111101011110111111111111111111111100000
AgR1689	2016	Bo	Dunedin	Otago		VNTR135	133.2MB	152.0MB	99.67%	90.2	23541	624073777777600	SB0054	65-3-5F-7F-FF-60	1100101000001110111111111111111111111100000
AgR1692	2013	Po	Orongorongo	Wellington	REA21	VNTR34	94.1MB	107.8MB	99.54%	61.6	20602	676573777777600	SB0130	6F-57-5F-7F-FF-60	1101111101011110111111111111111111111100000
AgR1693	1997	Po	Orongorongo	Wellington	REA21	VNTR34	54.9MB	61.0MB	99.67%	39.0	20156	676573777777600	SB0130	6F-57-5F-7F-FF-60	1101111101011110111111111111111111111100000
AgR1696	2006	Po	Orongorongo	Wellington	REA21	VNTR34	58.3MB	62.9MB	99.59%	40.7	11052	676573777777600	SB0130	6F-57-5F-7F-FF-60	1101111101011110111111111111111111111100000
AgR1697	2006	Po	Orongorongo	Wellington	REA21	VNTR34	77.4MB	89.1MB	99.62%	55.6	16979	676573777777600	SB0130	6F-57-5F-7F-FF-60	1101111101011110111111111111111111111100000
AgR1701	2016	Bo	Karamea	West Coast		VNTR53	168.5MB	183.9MB	99.38%	112.1	23398	676573777777600	SB0130	6F-57-5F-7F-FF-60	1101111101011110111111111111111111111100000
AgR1702	2016	Pi	LittleWanganui	West Coast		VNTR53	157.3MB	182.9MB	99.41%	105.9	18573	676573777777600	SB0130	6F-57-5F-7F-FF-60	1101111101011110111111111111111111111100000
AgR1703	2016	Fe	WetherHill	Southland		VNTR19	139.2MB	150.3MB	99.44%	90.7	14140	676573777776200	SB1504	6F-57-5F-7F-FE-20	1101111101011110111111111111111111100100000
AgR1704	2016	Fe	Wairio	Southland		VNTR103	145.2MB	165.2MB	99.49%	91.4	13716	664073777777600	SB0140	6D-3-5F-7F-FF-60	1101101000001110111111111111111111111100000
AgR1705	2016	Fe	MtCargill	Otago		VNTR103	154.5MB	181.0MB	99.52%	100.3	18823	664073777777600	SB0140	6D-3-5F-7F-FF-60	1101101000001110111111111111111111111100000
AgR1706	2016	Bo	Dobson	West Coast		VNTR35	173.0MB	199.6MB	99.56%	117.0	21385	676573777777600	SB0130	6F-57-5F-7F-FF-60	1101111101011110111111111111111111111100000
AgR1707	2016	Fe	SouthernNevis	Otago/Southland		VNTR19	156.6MB	186.0MB	99.48%	104.6	18035	676573777776200	SB1504	6F-57-5F-7F-FE-20	1101111101011110111111111111111111100100000
AgR1708	2016	Fe	MtLinton	Southland		VNTR19	162.3MB	190.2MB	99.52%	108.5	18541	676573777776200	SB1504	6F-57-5F-7F-FE-20	1101111101011110111111111111111111100100000
AgR1709	2016	Fe	MtLinton	Southland		VNTR19	128.2MB	135.8MB	99.33%	81.2	10707	676573777776200	SB1504	6F-57-5F-7F-FE-20	1101111101011110111111111111111111100100000
AgR1710	2016	Fe	MtLinton	Southland		VNTR19	149.5MB	170.2MB	99.56%	100.1	18698	676573777776200	SB1504	6F-57-5F-7F-FE-20	1101111101011110111111111111111111100100000
AgR1711	2016	Fe	MtLinton	Southland		VNTR19	126.1MB	141.4MB	99.43%	79.3	10684	676573777776200	SB1504	6F-57-5F-7F-FE-20	1101111101011110111111111111111111100100000
AgR1712	2016	Fe	Letham	Southland		VNTR19	139.6MB	156.4MB	99.47%	95.2	13747	676573777776200	SB1504	6F-57-5F-7F-FE-20	1101111101011110111111111111111111100100000
AgR1713	2016	Fe	MtLinton	Southland		VNTR19	123.0MB	144.5MB	99.45%	79.1	12051	676573777776200	SB1504	6F-57-5F-7F-FE-20	1101111101011110111111111111111111100100000
AgR1714	2016	Po	JonesFlatHariHari	West Coast		VNTR59	165.7MB	185.8MB	99.42%	111.0	19593	676573777777600	SB0130	6F-57-5F-7F-FF-60	1101111101011110111111111111111111111100000
AgR1715	2016	Po	JonesFlatHariHari	West Coast		VNTR59	175.8MB	198.9MB	99.41%	117.1	21849	676573777777600	SB0130	6F-57-5F-7F-FF-60	1101111101011110111111111111111111111100000
AgR1716	2016	Po	MainDivideSurvey	West Coast		VNTR106	135.4MB	147.2MB	99.47%	81.4	11035	676503377777600	N/A	6F-54-1B-7F-FF-60	1101111101010000110111111111111111111100000
AgR1717	2016	Bo	Middlemarch	Otago		VNTR62	147.6MB	161.8MB	99.51%	88.9	14771	664073777777600	SB0140	6D-3-5F-7F-FF-60	1101101000001110111111111111111111111100000
AgR1718	2016	Fe	Benmore	Otago		VNTR27	118.8MB	137.1MB	99.46%	69.9	13447	664073777777600	SB0140	6D-3-5F-7F-FF-60	1101101000001110111111111111111111111100000
AgR1719	2016	Fe	Benmore	Otago		VNTR27	79.0MB	83.6MB	99.33%	42.4	4039	664073777777600	SB0140	6D-3-5F-7F-FF-60	1101101000001110111111111111111111111100000
AgR1720	2016	Fe	Benmore	Otago		VNTR133	176.7MB	192.5MB	99.37%	108.0	18340	664073777777600	SB0140	6D-3-5F-7F-FF-60	1101101000001110111111111111111111111100000
AgR1721	2016	Fe	Benmore	Otago		VNTR27	101.9MB	110.7MB	99.44%	60.7	6736	664073777777600	SB0140	6D-3-5F-7F-FF-60	1101101000001110111111111111111111111100000
AgR1722	2016	Fe	Timaru	Canterbury		VNTR137	108.1MB	109.6MB	99.42%	62.1	7599	664073777777600	SB0140	6D-3-5F-7F-FF-60	1101101000001110111111111111111111111100000
AgR1723	2016	Bo	BarrytownRunanaga	West Coast		VNTR59	132.2MB	149.2MB	99.38%	80.6	12562	676573777777600	SB0130	6F-57-5F-7F-FF-60	1101111101011110111111111111111111111100000
AgR1724	2016	Bo	Wanaka	Otago		VNTR24	161.9MB	177.8MB	99.52%	100.7	17389	664073777777600	SB0140	6D-3-5F-7F-FF-60	1101101000001110111111111111111111111100000
AgR1725	2016	Bo	Ranfurly	Otago		VNTR28	145.2MB	156.0MB	99.45%	86.3	13658	664073777777600	SB0140	6D-3-5F-7F-FF-60	1101101000001110111111111111111111111100000
AgR1726	2016	Fe	MtCargill	Otago		VNTR103	122.7MB	136.5MB	99.52%	72.5	11083	664073777777600	SB0140	6D-3-5F-7F-FF-60	1101101000001110111111111111111111111100000
AgR1727	2016	Pi	UpperTimaruCreek	Canterbury		VNTR137	146.3MB	162.4MB	99.49%	88.9	13999	664073777777600	SB0140	6D-3-5F-7F-FF-60	1101101000001110111111111111111111111100000
AgR1728	2016	Fe	TwinlawSurvey	Southland		VNTR19	124.9MB	135.7MB	99.39%	74.4	10968	676573777776200	SB1504	6F-57-5F-7F-FE-20	1101111101011110111111111111111111100100000
AgR1729	2016	Pi	UpperTimaruCreek	Canterbury		VNTR137	138.7MB	157.0MB	99.46%	84.5	14103	664073777777600	SB0140	6D-3-5F-7F-FF-60	1101101000001110111111111111111111111100000
AgR1730	2016	Bo	Reefton	West Coast		VNTR59	117.9MB	131.2MB	99.30%	69.4	9368	676573777777600	SB0130	6F-57-5F-7F-FF-60	1101111101011110111111111111111111111100000
AgR1731	2016	Fe	EastHawea	Otago		VNTR137	101.3MB	112.1MB	99.46%	61.4	8120	664073777777600	SB0140	6D-3-5F-7F-FF-60	1101101000001110111111111111111111111100000
AgR1732	2016	Bo	Karamea	West Coast		VNTR51	119.5MB	130.3MB	99.41%	73.0	9798	676573777777600	SB0130	6F-57-5F-7F-FF-60	1101111101011110111111111111111111111100000
AgR1733	2016	Bo	Karamea	West Coast		VNTR21	94.8MB	101.6MB	99.22%	45.0	5009	676573777777600	SB0130	6F-57-5F-7F-FF-60	1101111101011110111111111111111111111100000
AgR1734	2016	Bo	Westport	West Coast		VNTR138	110.5MB	121.5MB	99.39%	64.8	8942	676573777777600	SB0130	6F-57-5F-7F-FF-60	1101111101011110111111111111111111111100000
AgR1735	2016	Pi	UpperTimaruCreek	Otago		VNTR137	101.5MB	113.1MB	99.43%	61.8	10334	664073777777600	SB0140	6D-3-5F-7F-FF-60	1101101000001110111111111111111111111100000
AgR1736	2016	Fe	MtCargill	Otago		VNTR103	161.2MB	176.6MB	99.53%	99.2	17255	664073777777600	SB0140	6D-3-5F-7F-FF-60	1101101000001110111111111111111111111100000
AgR1737	2016	Bo	PortChalmers	Otago		VNTR103	166.7MB	186.4MB	99.53%	102.1	18958	664073777777600	SB0140	6D-3-5F-7F-FF-60	1101101000001110111111111111111111111100000
AgR1738	2016	Bo	Kumara	West Coast		VNTR59	92.3MB	100.1MB	99.28%	61.4	7297	676573777777600	SB0130	6F-57-5F-7F-FF-60	1101111101011110111111111111111111111100000
AgR1739	2016	Fe	WairepoCreek	Otago		VNTR46	86.1MB	101.3MB	99.14%	59.4	8046	676573777777600	SB0130	6F-57-5F-7F-FF-60	1101111101011110111111111111111111111100000
AgR1740	2016	Fe	MtCargill	Otago		VNTR103	109.9MB	126.7MB	99.48%	76.7	10333	664073777777600	SB0140	6D-3-5F-7F-FF-60	1101101000001110111111111111111111111100000
AgR1741	2016	Pi	UpperTimaruCreek	Canterbury		VNTR137	76.9MB	91.2MB	99.36%	53.2	6599	664073777777600	SB0140	6D-3-5F-7F-FF-60	1101101000001110111111111111111111111100000
AgR1742	2016	Fe	WairepoCreek	Otago		VNTR46	85.8MB	73.1MB	99.22%	49.2	5969	676573777777600	SB0130	6F-57-5F-7F-FF-60	1101111101011110111111111111111111111100000
AgR1743	2016	Bo	Christchurch	Canterbury		VNTR28	157.0MB	138.2MB	99.52%	93.5	13246	664073777777600	SB0140	6D-3-5F-7F-FF-60	1101101000001110111111111111111111111100000
AgR1744	2016	Bo	Waikato	Central North Island		VNTR1	108.4MB	122.4MB	99.67%	74.4	8986	664073777777600	SB0140	6D-3-5F-7F-FF-60	1101101000001110111111111111111111111100000
AgR1745	2016	Bo	Runanaga	Canterbury/Otago		VNTR59	134.0MB	148.7MB	99.32%	90.7	12921	676573777777600	SB0130	6F-57-5F-7F-FF-60	1101111101011110111111111111111111111100000
AgR1746	2016	Bo	Otira	West Coast			112.2MB	123.6MB	99.28%	75.6	9702	676573777777600	SB0130	6F-57-5F-7F-FF-60	1101111101011110111111111111111111111100000
AgR1747	2007	Bo	Waitati	Otago		VNTR28	111.6MB	129.8MB	99.45%	78.4	9895	664073777777600	SB0140	6D-3-5F-7F-FF-60	1101101000001110111111111111111111111100000
AgR1748	2016	Fe	Hogburn	Otago		VNTR140	88.2MB	97.1MB	99.41%	59.6	6899	064073777777600	SB0484	D-3-5F-7F-FF-60	0001101000001110111111111111111111111100000
AgR1749	2016	Pi	UpperTimaruCreek	Canterbury		VNTR137	77.8MB	87.8MB	99.40%	52.3	7089	664073777777600	SB0140	6D-3-5F-7F-FF-60	1101101000001110111111111111111111111100000
AgR1750	2016	Fe	WairepoCreek	Otago		VNTR133	107.1MB	127.4MB	99.24%	72.8	11459	664073777777600	SB0140	6D-3-5F-7F-FF-60	1101101000001110111111111111111111111100000
AgR1751	2016	Bo	Westport	West Coast		VNTR138	104.8MB	120.5MB	99.46%	72.6	9647	676573777777600	SB0130	6F-57-5F-7F-FF-60	1101111101011110111111111111111111111100000
AgR1752	2016	Bo	Otira	West Coast		VNTR59	117.7MB	135.0MB	99.36%	81.8	12531	676573777777600	SB0130	6F-57-5F-7F-FF-60	1101111101011110111111111111111111111100000
AgR1753	2016	Bo	Hastings	Hawks Bay		VNTR10	75.5MB	85.6MB	99.57%	49.4	6313	664073777777200	SB0273	6D-3-5F-7F-FF-20	1101101000001110111111111111111111110100000
AgR1754	2016	Bo	Dobson	West Coast		VNTR35	101.0MB	121.7MB	99.50%	71.1	10455	676573777777600	SB0130	6F-57-5F-7F-FF-60	1101111101011110111111111111111111111100000
AgR1755	2016	Bo	Dobson	West Coast		VNTR35	131.4MB	140.4MB	99.47%	87.8	11922	676573777777600	SB0130	6F-57-5F-7F-FF-60	1101111101011110111111111111111111111100000
AgR1756	2016	Po	Adhoc	Otago		VNTR103	95.1MB	110.7MB	99.45%	66.4	8634	664073777777600	SB0140	6D-3-5F-7F-FF-60	1101101000001110111111111111111111111100000
AgR1757	2016	Bo	Waikato	Central North Island		VNTR139	141.5MB	154.9MB	99.73%	92.6	15605	664073777777600	SB0140	6D-3-5F-7F-FF-60	1101101000001110111111111111111111111100000
AgR1758	2010	Fe	NorthTaieriHills	Otago		VNTR26	100.3MB	112.9MB	99.44%	69.8	8608	664073777777600	SB0140	6D-3-5F-7F-FF-60	1101101000001110111111111111111111111100000
AgR1759	2016	Bo	Wainuiomata	Wellington		VNTR34	113.5MB	125.7MB	99.46%	78.0	11554	676573777777600	SB0130	6F-57-5F-7F-FF-60	1101111101011110111111111111111111111100000
AgR1760	2016	Bo	Wainuiomata	Wellington		VNTR34	94.0MB	112.3MB	99.40%	64.2	9711	676573777777600	SB0130	6F-57-5F-7F-FF-60	1101111101011110111111111111111111111100000
AgR1761	2016	Bo	Kumara	West Coast		VNTR59	120.9MB	138.2MB	99.09%	86.1	12479	676573777777600	SB0130	6F-57-5F-7F-FF-60	1101111101011110111111111111111111111100000
AgR1762	2016	Bo	Westport	West Coast		VNTR138	123.0MB	140.2MB	99.46%	81.5	12057	676573777777600	SB0130	6F-57-5F-7F-FF-60	1101111101011110111111111111111111111100000
AgR1763	2016	Bo	Kumara	West Coast		VNTR59	130.3MB	147.0MB	99.15%	90.3	13459	676573777777600	SB0130	6F-57-5F-7F-FF-60	1101111101011110111111111111111111111100000
AgR1764	2016	Bo	Waikato	Central North Island		VNTR139	162.2MB	195.0MB	99.82%	109.4	24282	664073777777600	SB0140	6D-3-5F-7F-FF-60	1101101000001110111111111111111111111100000
AgR1765	2016	Bo	Waikato	Central North Island		VNTR139	122.3MB	137.1MB	99.69%	81.6	10729	664073777777600	SB0140	6D-3-5F-7F-FF-60	1101101000001110111111111111111111111100000
AgR1766	2016	Bo	Waikato	Central North Island		VNTR139	99.9MB	109.2MB	99.67%	64.5	7108	664073777777600	SB0140	6D-3-5F-7F-FF-60	1101101000001110111111111111111111111100000
AgR1767	2016	Bo	Waikato	Central North Island		VNTR1	119.8MB	103.1MB	99.65%	65.2	8605	664073777777600	SB0140	6D-3-5F-7F-FF-60	1101101000001110111111111111111111111100000
AgR1768	2016	Bo	Waikato	Central North Island		VNTR139	139.0MB	154.8MB	99.73%	92.2	14400	664073777777600	SB0140	6D-3-5F-7F-FF-60	1101101000001110111111111111111111111100000
AgR1769	2016	Bo	Westport	West Coast		VNTR53	157.4MB	171.5MB	99.37%	88.1	12652	676573777777600	SB0130	6F-57-5F-7F-FF-60	1101111101011110111111111111111111111100000
AgR1770	2016	Bo	Karamea	West Coast		VNTR53	132.3MB	143.9MB	99.35%	72.7	10167	676573777777600	SB0130	6F-57-5F-7F-FF-60	1101111101011110111111111111111111111100000
AgR1773	1990	Ce	TePohue	Hawks Bay	REA215		74.4MB	81.5MB	99.54%	42.5	7531	660073777777600	SB1924	6C-3-5F-7F-FF-60	1101100000001110111111111111111111111100000
AgR1774	1990	Ce	TePohue	Hawks Bay			53.0MB	60.1MB	99.47%	30.5	5829	660073777777600	SB1924	6C-3-5F-7F-FF-60	1101100000001110111111111111111111111100000
AgR1775	1990	Ce	TePohue	Hawks Bay			143.6MB	164.4MB	99.76%	88.9	16823	664073777777600	SB0140	6D-3-5F-7F-FF-60	1101101000001110111111111111111111111100000
AgR1776	1990	Ce	TePohue	Hawks Bay	REA215		88.3MB	99.4MB	99.59%	52.1	12894	660073777777600	SB1924	6C-3-5F-7F-FF-60	1101100000001110111111111111111111111100000
AgR1777	1994	Ce	KiamanawaRanges	Taihape			64.4MB	75.0MB	99.58%	38.3	7396	664073777777600	SB0140	6D-3-5F-7F-FF-60	1101101000001110111111111111111111111100000
AgR1778	1994	Ce	KiamanawaRanges	Taihape			137.2MB	150.8MB	99.75%	81.8	13384	664073777777600	SB0140	6D-3-5F-7F-FF-60	1101101000001110111111111111111111111100000
AgR1779	1994	Ce	KiamanawaRanges	Taihape			74.8MB	84.6MB	99.31%	45.1	6823	664073777777600	SB0140	6D-3-5F-7F-FF-60	1101101000001110111111111111111111111100000
AgR1780	1995	Ce	Taupo	Taupo	REA115		170.5MB	188.1MB	99.75%	101.8	19901	664073777777600	SB0140	6D-3-5F-7F-FF-60	1101101000001110111111111111111111111100000
AgR1781	1996	Ce	Taupo	Taupo	REA115		107.2MB	116.6MB	99.70%	62.8	14758	664073777777600	SB0140	6D-3-5F-7F-FF-60	1101101000001110111111111111111111111100000
AgR1782	1996	Ce	Taupo	Taupo	REA115		67.5MB	77.0MB	99.57%	38.7	11633	664073777777600	SB0140	6D-3-5F-7F-FF-60	1101101000001110111111111111111111111100000
AgR1783	1996	Ce	MtBrucetoMikimikicrown	Wairarapa			73.1MB	82.3MB	99.34%	44.4	9045	676572177777600	N/A	6F-57-51-7F-FF-60	1101111101011110100011111111111111111100000
AgR1784	1996	Ce	UreweraNationalPark	Rotorua	REA115		54.8MB	61.2MB	99.55%	32.3	6167	664073777777600	SB0140	6D-3-5F-7F-FF-60	1101101000001110111111111111111111111100000
AgR1785	1997	Po	HoldsworthtoWoodsideCrown	Wellington			94.1MB	103.6MB	99.49%	56.1	9097	676573777777600	SB0130	6F-57-5F-7F-FF-60	1101111101011110111111111111111111111100000
AgR1786	1998	Fe	Taupo	Taupo			113.2MB	128.6MB	99.77%	68.8	11685	664073777777600	SB0140	6D-3-5F-7F-FF-60	1101101000001110111111111111111111111100000
AgR1787	1998	Fe	Iwitahi	Hawks Bay			90.3MB	102.1MB	99.69%	53.3	10060	664073777777600	SB0140	6D-3-5F-7F-FF-60	1101101000001110111111111111111111111100000
AgR1788	1998	Fe	Taupo	Taupo	REA115		136.3MB	158.6MB	99.78%	81.7	20106	664073777777600	SB0140	6D-3-5F-7F-FF-60	1101101000001110111111111111111111111100000
AgR1789	1998	Ce	KiamanawaRanges	Taupo			62.8MB	68.0MB	99.60%	36.8	5869	664073777777600	SB0140	6D-3-5F-7F-FF-60	1101101000001110111111111111111111111100000
AgR1790	2000	Ce	Taupo	Taupo	REA115		66.9MB	75.6MB	99.59%	39.3	6736	664073777777600	SB0140	6D-3-5F-7F-FF-60	1101101000001110111111111111111111111100000
AgR1791	2000	Po	Hastings	Hawks Bay	REA115		106.3MB	121.9MB	99.74%	64.2	11060	664073777777600	SB0140	6D-3-5F-7F-FF-60	1101101000001110111111111111111111111100000
AgR1792	2000	Po	Hastings	Hawks Bay			164.6MB	179.6MB	99.73%	101.1	16805	664073777777600	SB0140	6D-3-5F-7F-FF-60	1101101000001110111111111111111111111100000
AgR1793	2000	Ce	Taupo	Taupo	REA115		170.4MB	191.5MB	99.78%	105.9	19922	664073777777600	SB0140	6D-3-5F-7F-FF-60	1101101000001110111111111111111111111100000
AgR1794	2000	Ce	Wellington	Wellington	REA115		178.4MB	198.2MB	99.79%	112.7	20423	664073777777600	SB0140	6D-3-5F-7F-FF-60	1101101000001110111111111111111111111100000
AgR1795	2001	Po	Taumaranui	King Country			134.8MB	146.6MB	99.70%	80.7	11286	664073777777600	SB0140	6D-3-5F-7F-FF-60	1101101000001110111111111111111111111100000
AgR1796	2001	Ce	Unknown	Unknown			155.9MB	175.5MB	99.75%	96.6	17596	664073777777600	SB0140	6D-3-5F-7F-FF-60	1101101000001110111111111111111111111100000
AgR1797	2001	Ce	UreweraNatPark	Bay of Plenty			186.8MB	208.2MB	99.76%	113.6	23071	664073777777600	SB0140	6D-3-5F-7F-FF-60	1101101000001110111111111111111111111100000
AgR1798	2002	Pi	Hastings	Hawks Bay		VNTR2	183.6MB	193.5MB	99.73%	98.4	19440	664073777777600	SB0140	6D-3-5F-7F-FF-60	1101101000001110111111111111111111111100000
AgR1799	2001	Po	Pongaroa	Manawatu			168.9MB	183.7MB	99.45%	89.5	23841	676573777777600	SB0130	6F-57-5F-7F-FF-60	1101111101011110111111111111111111111100000
AgR1830	2000	Bo	Patoka	Hawks Bay	REA115	VNTR2	175.1MB	203.0MB	99.81%	107.9	26226	664073777777600	SB0140	6D-3-5F-7F-FF-60	1101101000001110111111111111111111111100000
AgR10632	2015	Ce	Wanaka	Otago		VNTR24	64.6MB	75.3MB	99.64%	44.7	6551	664073777777600	SB0140	6D-3-5F-7F-FF-60	1101101000001110111111111111111111111100000
AgR10653	1994	Pi	Hauhungaroa	King Country	REA115		107.8MB	125.0MB	99.89%	73.9	16372	664073777777600	SB0140	6D-3-5F-7F-FF-60	1101101000001110111111111111111111111100000
AgR10667	2010	Bo	ClarksJunction	Otago		VNTR28	65.4MB	76.8MB	99.48%	46.6	5563	664073777777600	SB0140	6D-3-5F-7F-FF-60	1101101000001110111111111111111111111100000
AgR10680	2015	Pi	MolesworthStn	Marlborough		VNTR101	63.1MB	75.2MB	99.52%	44.1	5300	676573777776200	SB1504	6F-57-5F-7F-FE-20	1101111101011110111111111111111111100100000
AgR10682	2016	Bo	Blackball	West Coast		VNTR35	59.3MB	69.2MB	99.52%	41.9	7719	676573777777600	SB0130	6F-57-5F-7F-FF-60	1101111101011110111111111111111111111100000
AgR10683	2016	Bo	Hawera	Taranaki		VNTR113	77.2MB	88.7MB	99.47%	53.1	11142	676573777777600	SB0130	6F-57-5F-7F-FF-60	1101111101011110111111111111111111111100000
AgR10691	2012	Po	Orongorongo	Wellington	REA21	VNTR34	148.2MB	148.2MB	99.58%	69.3	538902	676573777777600	SB0130	6F-57-5F-7F-FF-60	1101111101011110111111111111111111111100000
AgR10695	2004	Po	Orongorongo	Wellington	REA21	VNTR34	71.5MB	85.4MB	99.51%	46.6	11121	676573777777600	SB0130	6F-57-5F-7F-FF-60	1101111101011110111111111111111111111100000
AgR11295	2001	Ce	Winton	Southland	REA93	VNTR17	114.5MB	117.0MB	99.55%	62.6	7018	674573777777600	SB1031	6F-17-5F-7F-FF-60	1101111001011110111111111111111111111100000
AgR11491	2001	Bo	Winton	Southland	REA93	VNTR17	114.8MB	126.2MB	99.66%	66.6	9576	674573777777600	SB1031	6F-17-5F-7F-FF-60	1101111001011110111111111111111111111100000
AgR16101	2015	Bo	Wainuiomata	Wellington		VNTR34	65.5MB	81.2MB	99.49%	48.4	5753	676573777777600	SB0130	6F-57-5F-7F-FF-60	1101111101011110111111111111111111111100000
AgR16102	2014	Pi	Hauturu	Waikato		VNTR2	61.2MB	72.1MB	99.75%	44.7	5314	664073777777600	SB0140	6D-3-5F-7F-FF-60	1101101000001110111111111111111111111100000
AgR16103	2014	Pi	Hatepe	Taupo		VNTR2	84.6MB	98.0MB	99.79%	61.9	10712	664073777777600	SB0140	6D-3-5F-7F-FF-60	1101101000001110111111111111111111111100000
AgR16104	2014	Bo	Wainuiomata	Wellington		VNTR127	43.6MB	52.2MB	99.40%	33.1	3620	676573777777600	SB0130	6F-57-5F-7F-FF-60	1101111101011110111111111111111111111100000
AgR16105	2016	Bo	Reefton	West Coast		VNTR136	66.5MB	77.8MB	99.45%	50.0	7074	676503377777600	N/A	6F-54-1B-7F-FF-60	1101111101010000110111111111111111111100000
AgR16106	2015	Bo	Wainuiomata	Wellington		VNTR34	50.6MB	59.7MB	99.37%	38.0	4078	676573777777600	SB0130	6F-57-5F-7F-FF-60	1101111101011110111111111111111111111100000
AgR16107	2015	Bo	Wainuiomata	Wellington		VNTR34	60.6MB	72.9MB	99.47%	45.6	4505	676573777777600	SB0130	6F-57-5F-7F-FF-60	1101111101011110111111111111111111111100000
AgR16794	2016	Bo	Waikato	Central North Island		VNTR139	100.6MB	107.6MB	99.68%	56.8	6447	664073777777600	SB0140	6D-3-5F-7F-FF-60	1101101000001110111111111111111111111100000
AgR17100	2001	Po	Pongaroa	Manawatu			143.1MB	157.3MB	99.47%	76.8	17014	676573777777600	SB0130	6F-57-5F-7F-FF-60	1101111101011110111111111111111111111100000
AgR17101	2002	Po	HauhungaroaRanges	Taupo			199.6MB	210.0MB	99.79%	109.7	22996	664073777777600	SB0140	6D-3-5F-7F-FF-60	1101101000001110111111111111111111111100000
AgR17102	2003	Pi	MangataniwhaArea	Gisborne	REA115		173.2MB	187.0MB	99.73%	93.2	18882	664073777777600	SB0140	6D-3-5F-7F-FF-60	1101101000001110111111111111111111111100000
AgR17103	2003	Po	Napier	Hawks Bay			120.2MB	121.5MB	99.64%	62.9	7802	664073777777600	SB0140	6D-3-5F-7F-FF-60	1101101000001110111111111111111111111100000
AgR17104	2003	Pi	Whirinaki	Waikato	REA115		167.3MB	179.1MB	99.70%	92.6	18599	664073777777600	SB0140	6D-3-5F-7F-FF-60	1101101000001110111111111111111111111100000
AgR17105	2003	Pi	TeHoe	Waikato			118.1MB	122.6MB	99.59%	60.1	9803	664073777777600	SB0140	6D-3-5F-7F-FF-60	1101101000001110111111111111111111111100000
AgR17106	2004	Pi	Lakeshore	Taupo			185.1MB	197.7MB	99.76%	104.0	21197	664073777777600	SB0140	6D-3-5F-7F-FF-60	1101101000001110111111111111111111111100000
AgR17107	2004	Pi	Unknown	Taupo	REA115		201.6MB	227.9MB	99.85%	121.2	32593	664073777777600	SB0140	6D-3-5F-7F-FF-60	1101101000001110111111111111111111111100000
AgR17108	2004	Po	Glenfalls	Hawks Bay	REA115		144.7MB	162.9MB	99.78%	87.9	16044	664073777777600	SB0140	6D-3-5F-7F-FF-60	1101101000001110111111111111111111111100000
AgR17109	2005	Ce	Taupo	Taupo	REA115		210.5MB	220.9MB	99.82%	113.0	28303	664073777777600	SB0140	6D-3-5F-7F-FF-60	1101101000001110111111111111111111111100000
AgR17110	2005	Pi	WesternTaurarua	Manawatu	REA53	VNTR21	186.5MB	203.1MB	99.55%	100.4	26248	676573777777600	SB0130	6F-57-5F-7F-FF-60	1101111101011110111111111111111111111100000
AgR17111	2010	Pi	Kapiti	Wellington	REA81	VNTR74	200.9MB	207.9MB	99.29%	108.0	22189	676573775777600	N/A	6F-57-5F-7B-FF-60	1101111101011110111111111011111111111100000
AgR17112	2010	Pi	Akatarawa	Wellington			152.7MB	165.1MB	99.24%	81.7	17346	676573775777600	N/A	6F-57-5F-7B-FF-60	1101111101011110111111111011111111111100000
AgR17113	2010	Pi	Akatarawa	Wellington	REA81	VNTR74	174.9MB	180.5MB	99.25%	92.3	21210	676573775777600	N/A	6F-57-5F-7B-FF-60	1101111101011110111111111011111111111100000
AgR17114	2011	Pi	OtakiBuffer	Manawatu		VNTR36	121.9MB	127.5MB	99.39%	60.4	11130	676573777777600	SB0130	6F-57-5F-7F-FF-60	1101111101011110111111111111111111111100000
AgR17115	2011	Po	Hatepe	Taupo		VNTR2	182.5MB	196.4MB	99.81%	93.8	29585	664073777777600	SB0140	6D-3-5F-7F-FF-60	1101101000001110111111111111111111111100000
AgR17116	2011	Po	Hatepe	Taupo		VNTR96	172.7MB	186.9MB	99.76%	91.2	23035	664073777777600	SB0140	6D-3-5F-7F-FF-60	1101101000001110111111111111111111111100000
AgR17117	2011	Po	Hatepe	Taupo			210.6MB	231.5MB	99.84%	108.0	41708	664073777777600	SB0140	6D-3-5F-7F-FF-60	1101101000001110111111111111111111111100000
AgR17118	2011	Pi	Kapiti	Wellington		VNTR74	173.5MB	184.7MB	99.24%	90.4	21083	676573775777600	N/A	6F-57-5F-7B-FF-60	1101111101011110111111111011111111111100000
AgR17119	2012	Ce	Turangi	Waikato			175.6MB	180.8MB	99.80%	93.8	17754	664073777777600	SB0140	6D-3-5F-7F-FF-60	1101101000001110111111111111111111111100000
AgR17120	2012	Pi	MtBrucetoMikimikicrown	Wairarapa		VNTR40	162.7MB	174.0MB	99.51%	87.0	18595	676573777777600	SB0130	6F-57-5F-7F-FF-60	1101111101011110111111111111111111111100000
AgR17121	2013	Pi	BayofPlenty	Bay of Plenty		VNTR2	214.0MB	227.8MB	99.83%	115.2	33377	664073777777600	SB0140	6D-3-5F-7F-FF-60	1101101000001110111111111111111111111100000
AgR17122	2013	Pi	Otakibuffer	Wellington		VNTR36	182.5MB	198.1MB	99.55%	96.4	26050	676573777777600	SB0130	6F-57-5F-7F-FF-60	1101111101011110111111111111111111111100000
AgR17123	2015	Pi	Turangi	Turangi		VNTR31	200.4MB	216.7MB	99.80%	108.6	31298	664073777777600	SB0140	6D-3-5F-7F-FF-60	1101101000001110111111111111111111111100000
AgR17124	1992	Po	HochstetterForest	West Coast	REA27	VNTR70	139.4MB	159.9MB	99.56%	89.0	16372	676573777777600	SB0130	6F-57-5F-7F-FF-60	1101111101011110111111111111111111111100000
AgR17126	1999	Po	HochstetterForest	West Coast	REA27		152.5MB	164.8MB	99.55%	97.3	19992	676573777777600	SB0130	6F-57-5F-7F-FF-60	1101111101011110111111111111111111111100000
AgR17127	2000	Pi	HochstetterForest	West Coast	REA27		179.7MB	203.7MB	99.58%	113.7	28223	676573777777600	SB0130	6F-57-5F-7F-FF-60	1101111101011110111111111111111111111100000
AgR17128	2000	Ce	HochstetterForest	West Coast	REA27		140.6MB	155.7MB	99.55%	89.9	16530	676573777777600	SB0130	6F-57-5F-7F-FF-60	1101111101011110111111111111111111111100000
AgR17129	2010	Ce	Tasman	Tasman	REA21	VNTR35	158.6MB	172.5MB	99.56%	101.3	20613	676573777777600	SB0130	6F-57-5F-7F-FF-60	1101111101011110111111111111111111111100000
AgR17131	1989	Fe	MolesworthStation	Marlborough	REA65		216.6MB	231.7MB	99.59%	139.0	34335	676573777776200	SB1504	6F-57-5F-7F-FE-20	1101111101011110111111111111111111100100000
AgR17132	2006	St	KarameaNorth	West Coast	REA12		130.0MB	148.9MB	99.40%	83.9	14817	676573777777600	SB0130	6F-57-5F-7F-FF-60	1101111101011110111111111111111111111100000
AgR17133	2006	Po	Karamea	West Coast	REA12		152.0MB	163.3MB	99.39%	95.7	18911	676573777777600	SB0130	6F-57-5F-7F-FF-60	1101111101011110111111111111111111111100000
AgR17134	2006	Po	Karamea	West Coast	REA12		133.0MB	139.0MB	99.33%	62.1	16786	676573777777600	SB0130	6F-57-5F-7F-FF-60	1101111101011110111111111111111111111100000
AgR17139	2002	Fe	Blenheim	Marlborough	REA62		190.2MB	196.8MB	99.53%	99.6	20796	676573777776200	SB1504	6F-57-5F-7F-FE-20	1101111101011110111111111111111111100100000
AgR17140	2002	Fe	Blenheim	Marlborough	REA247		155.9MB	168.0MB	99.43%	81.1	16265	676573777776200	SB1504	6F-57-5F-7F-FE-20	1101111101011110111111111111111111100100000
AgR17141	2009	Ce	ClarenceValley	Canterbury	REA62	VNTR20	173.7MB	186.2MB	99.53%	90.8	23563	676573777776200	SB1504	6F-57-5F-7F-FE-20	1101111101011110111111111111111111100100000
AgR17142	2011	Ce	Kekerengu	Canterbury		VNTR20	140.0MB	151.1MB	99.46%	70.5	17637	676573777776200	SB1504	6F-57-5F-7F-FE-20	1101111101011110111111111111111111100100000
AgR17143	2011	Ce	ADHOC	MarlboroughNorth Canterbury		VNTR56	168.4MB	181.0MB	99.52%	88.4	20527	676573777776200	SB1504	6F-57-5F-7F-FE-20	1101111101011110111111111111111111100100000
AgR17144	2012	Ce	ADHOC	North Canterbury		VNTR20	144.8MB	157.3MB	99.50%	74.9	15866	676573777776200	SB1504	6F-57-5F-7F-FE-20	1101111101011110111111111111111111100100000
AgR17145	2002	Fe	Featherston	Wairarapa	REA21		170.6MB	180.6MB	99.53%	88.9	19185	676573777777600	SB0130	6F-57-5F-7F-FF-60	1101111101011110111111111111111111111100000
AgR17146	2002	Fe	Featherston	Wairarapa	REA21		171.6MB	185.1MB	99.52%	86.0	23220	676573777777600	SB0130	6F-57-5F-7F-FF-60	1101111101011110111111111111111111111100000
AgR17147	2002	Fe	Featherston	Wairarapa	REA21		98.3MB	101.0MB	99.36%	47.2	7533	676573777777600	SB0130	6F-57-5F-7F-FF-60	1101111101011110111111111111111111111100000
AgR17148	1993	Po	Featherston	Wairarapa	REA21		140.7MB	152.2MB	99.44%	70.9	18091	676573777777600	SB0130	6F-57-5F-7F-FF-60	1101111101011110111111111111111111111100000
AgR17149	2004	Pi	Featherston	Wairarapa	REA21		179.7MB	191.0MB	99.56%	95.6	19997	676573777777600	SB0130	6F-57-5F-7F-FF-60	1101111101011110111111111111111111111100000
AgR17150	1996	Fel	Featherston	Wairarapa	REA21		184.7MB	191.1MB	99.54%	96.0	20210	676573777777600	SB0130	6F-57-5F-7F-FF-60	1101111101011110111111111111111111111100000
AgR17151	1996	Fe	Featherston	Wairarapa	REA21		177.8MB	191.4MB	99.53%	90.5	23852	676573777777600	SB0130	6F-57-5F-7F-FF-60	1101111101011110111111111111111111111100000
AgR17152	1996	Fe	Featherston	Wairarapa	REA21		190.3MB	201.5MB	99.55%	99.2	25121	676573777777600	SB0130	6F-57-5F-7F-FF-60	1101111101011110111111111111111111111100000
AgR17153	1996	Fe	Featherston	Wairarapa	REA21		193.0MB	209.5MB	99.53%	99.9	27753	676573777777600	SB0130	6F-57-5F-7F-FF-60	1101111101011110111111111111111111111100000
AgR17154	1982	Po	Featherston	Wairarapa	REA49		83.2MB	87.2MB	99.27%	41.2	8858	676573777777600	SB0130	6F-57-5F-7F-FF-60	1101111101011110111111111111111111111100000
AgR17155	2004	Pi	Featherston	Wairarapa	REA53		193.7MB	207.5MB	99.54%	105.3	19051	676573777777600	SB0130	6F-57-5F-7F-FF-60	1101111101011110111111111111111111111100000
AgR17156	2004	Pi	Featherston	Wairarapa	REA53		184.5MB	199.5MB	99.49%	98.8	18706	676573777777600	SB0130	6F-57-5F-7F-FF-60	1101111101011110111111111111111111111100000
AgR17157	1995	He	Featherston	Wairarapa	REA80		199.5MB	217.4MB	99.50%	111.1	19975	676533777777600	SB0998	6F-55-5F-7F-FF-60	1101111101010110111111111111111111111100000
AgR17158	1995	Fe	Featherston	Wairarapa	REA80		173.3MB	187.8MB	99.45%	93.1	16827	676533777777600	SB0998	6F-55-5F-7F-FF-60	1101111101010110111111111111111111111100000
AgR30347	2003	Bo	Napier	Hawks Bay	REA115	VNTR2	171.2MB	186.5MB	99.80%	104.7	20626	664073777777600	SB0140	6D-3-5F-7F-FF-60	1101101000001110111111111111111111111100000
AgR41016	2004	Bo	TePohue	Hawks Bay	REA115	VNTR2	200.7MB	231.1MB	99.82%	103.2	26181	664073777777600	SB0140	6D-3-5F-7F-FF-60	1101101000001110111111111111111111111100000
AgR41346	2004	Bo	Patoka	Hawks Bay	REA115	VNTR2	197.2MB	213.3MB	99.81%	116.4	23391	664073777777600	SB0140	6D-3-5F-7F-FF-60	1101101000001110111111111111111111111100000
AgR41511	2004	Bo	Whataroa	West Coast	REA19	VNTR43	185.5MB	209.4MB	99.50%	106.8	22862	676573777777600	SB0130	6F-57-5F-7F-FF-60	1101111101011110111111111111111111111100000
AgR60575	2006	Bo	Mangakino	Waikato	REA126	VNTR2	173.1MB	187.4MB	99.77%	90.5	17463	664073777777600	SB0140	6D-3-5F-7F-FF-60	1101101000001110111111111111111111111100000
AgR070487	2017	Pi	Ruatiti	Central North Island		VNTR2	202.3MB	227.3MB	99.79%	102.7	25767	664073777777600	SB0140	6D-3-5F-7F-FF-60	1101101000001110111111111111111111111100000
AgR091153	2009	Po	TeWhenua	West Coast	REA21	VNTR76	122.6MB	137.9MB	99.48%	72.5	10419	676573777777600	SB0130	6F-57-5F-7F-FF-60	1101111101011110111111111111111111111100000
AgR100184	2010	Bo	Whataroa	West Coast	REA21	VNTR41	182.6MB	201.4MB	99.53%	106.5	20286	676573777777600	SB0130	6F-57-5F-7F-FF-60	1101111101011110111111111111111111111100000
AgR100477	2010	Bo	Whataroa	West Coast	REA27	VNTR66	198.6MB	224.8MB	99.54%	110.3	34477	676573777777600	SB0130	6F-57-5F-7F-FF-60	1101111101011110111111111111111111111100000
AgR100540	2010	Bo	Napier	Hawks Bay	REA115	VNTR2	133.4MB	150.5MB	99.73%	81.3	13799	664073777777600	SB0140	6D-3-5F-7F-FF-60	1101101000001110111111111111111111111100000
AgR100792	2010	Bo	Whataroa	West Coast	REA260	VNTR67	194.3MB	217.7MB	99.57%	113.8	22822	602573777777600	SB1446	60-57-5F-7F-FF-60	1100000101011110111111111111111111111100000
AgR101097	2010	Bo	Rangiora	North Canterbury	REA244	VNTR20	241.3MB	275.1MB	99.56%	138.4	46328	676573677776200	N/A	6F-57-5E-7F-FE-20	1101111101011110111101111111111111100100000
AgR106100	2015	Fe	Marlbourough	Marlborough		VNTR101	126.6MB	143.9MB	99.69%	86.9	16848	676573777776200	SB1504	6F-57-5F-7F-FE-20	1101111101011110111111111111111111100100000
AgR106108	2014	Hu	Moerewa	Northland		VNTR1	65.3MB	68.9MB	99.85%	40.8	4734	264073777777600	SB0673	2D-3-5F-7F-FF-60	0101101000001110111111111111111111111100000
AgR110570	2011	Bo	Invercargil	Southland	REA93	VNTR17	234.7MB	258.1MB	99.73%	138.7	31080	674573777777600	SB1031	6F-17-5F-7F-FF-60	1101111001011110111111111111111111111100000
AgR110732	2011	Bo	Balfour	Southland	REA93	VNTR17	153.5MB	167.1MB	99.64%	87.9	15362	674573777777600	SB1031	6F-17-5F-7F-FF-60	1101111001011110111111111111111111111100000
AgR120111	2012	Bo	Dobson	West Coast			151.7MB	169.6MB	99.47%	98.4	18645	676573777777600	SB0130	6F-57-5F-7F-FF-60	1101111101011110111111111111111111111100000
AgR120574	2012	Bo	Kumara	West Coast			167.5MB	203.1MB	99.41%	117.1	22784	676573777777600	SB0130	6F-57-5F-7F-FF-60	1101111101011110111111111111111111111100000
AgR121422	2012	Ce	Tapawera	Nelson		VNTR22	141.0MB	162.3MB	99.47%	92.4	13767	676573777777600	SB0130	6F-57-5F-7F-FF-60	1101111101011110111111111111111111111100000
AgR130037	2013	Bo	Kaikouraoura	North Canterbury			152.1MB	168.0MB	99.46%	87.7	15417	676573777776200	SB1504	6F-57-5F-7F-FE-20	1101111101011110111111111111111111100100000
AgR130038	2013	Bo	Kaikouraoura	North Canterbury			172.0MB	195.2MB	99.50%	100.4	21427	676573777376200	N/A	6F-57-5F-7E-FE-20	1101111101011110111111111110111111100100000
AgR130039	2013	Bo	Kaikouraoura	North Canterbury			155.2MB	172.8MB	99.48%	90.8	17434	676573777776200	SB1504	6F-57-5F-7F-FE-20	1101111101011110111111111111111111100100000
AgR130040	2013	Bo	Kaikouraoura	North Canterbury			173.9MB	197.0MB	99.48%	99.6	23971	676573777776200	SB1504	6F-57-5F-7F-FE-20	1101111101011110111111111111111111100100000
AgR130084	2013	Bo	Kaikouraoura	North Canterbury			157.7MB	178.8MB	99.51%	94.8	18498	676573777776200	SB1504	6F-57-5F-7F-FE-20	1101111101011110111111111111111111100100000
AgR130086	2013	Bo	Reefton	West Coast		VNTR35	174.0MB	203.7MB	99.54%	100.8	25783	676573777777600	SB0130	6F-57-5F-7F-FF-60	1101111101011110111111111111111111111100000
AgR130350	2013	Bo	Blenheim	North Canterbury		VNTR14	134.4MB	152.0MB	99.45%	76.9	15173	676573777756200	N/A	6F-57-5F-7F-EE-20	1101111101011110111111111111111011100100000
AgR130387	2013	Bo	Kaikouraoura	North Canterbury			191.5MB	169.3MB	99.53%	98.2	22628	676573777776200	SB1504	6F-57-5F-7F-FE-20	1101111101011110111111111111111111100100000
AgR130388	2013	Bo	Kaikouraoura	North Canterbury			164.2MB	187.2MB	99.50%	88.2	32284	676573777776200	SB1504	6F-57-5F-7F-FE-20	1101111101011110111111111111111111100100000
AgR130389	2013	Bo	Kaikouraoura	North Canterbury			184.5MB	214.3MB	99.52%	105.2	29801	676573777776200	SB1504	6F-57-5F-7F-FE-20	1101111101011110111111111111111111100100000
AgR130390	2013	Bo	Kaikouraoura	North Canterbury			164.2MB	191.0MB	99.50%	94.3	23852	676573777376200	N/A	6F-57-5F-7E-FE-20	1101111101011110111111111110111111100100000
AgR130502	2013	Bo	Kaikouraoura	North Canterbury		VNTR56	179.9MB	203.7MB	99.48%	100.9	31378	676573777776200	SB1504	6F-57-5F-7F-FE-20	1101111101011110111111111111111111100100000
AgR130563	2013	Bo	Timaru	Otago			141.0MB	143.5MB	99.34%	79.4	13515	676573777776200	SB1504	6F-57-5F-7F-FE-20	1101111101011110111111111111111111100100000
AgR140326	2014	Bo	Culvereden	Canterbury		VNTR20	171.1MB	198.1MB	99.54%	107.7	24685	676573777776200	SB1504	6F-57-5F-7F-FE-20	1101111101011110111111111111111111100100000
AgR150110	2015	Bo	Dobson	West Coast		VNTR59	164.7MB	181.1MB	99.56%	105.4	22291	676573777777600	SB0130	6F-57-5F-7F-FF-60	1101111101011110111111111111111111111100000
AgR160610	2016	Po	Inangahua	West Coast		VNTR138	206.2MB	238.5MB	99.55%	116.3	36651	676573777777600	SB0130	6F-57-5F-7F-FF-60	1101111101011110111111111111111111111100000
AgR160611	2016	Po	Inangahua	West Coast		VNTR73	165.1MB	181.4MB	99.48%	95.3	17551	676573777777600	SB0130	6F-57-5F-7F-FF-60	1101111101011110111111111111111111111100000
AgR160712	2016	Pi	StonyCreek	Wellington		VNTR40	160.0MB	174.3MB	99.46%	87.1	21305	676573777777600	SB0130	6F-57-5F-7F-FF-60	1101111101011110111111111111111111111100000
AgR160775	2016	Bo	Karamea	West Coast		VNTR35	138.4MB	145.0MB	99.46%	75.9	13319	676573777777600	SB0130	6F-57-5F-7F-FF-60	1101111101011110111111111111111111111100000
AgR160791	2016	Bo	Waikato	Central North Island		VNTR139	179.5MB	191.9MB	99.77%	99.4	20385	664073777777600	SB0140	6D-3-5F-7F-FF-60	1101101000001110111111111111111111111100000
AgR160792	2016	Bo	Waikato	Central North Island		VNTR139	175.3MB	193.2MB	99.76%	102.2	19574	664073777777600	SB0140	6D-3-5F-7F-FF-60	1101101000001110111111111111111111111100000
AgR160844	2016	Po	MtCargill	Otago		VNTR103	142.6MB	164.4MB	99.52%	95.6	15651	664073777777600	SB0140	6D-3-5F-7F-FF-60	1101101000001110111111111111111111111100000
AgR160852	2016	Bo	Kekerengu	North Canterbury		VNTR20	147.9MB	155.5MB	99.46%	82.1	14070	676573777776200	SB1504	6F-57-5F-7F-FE-20	1101111101011110111111111111111111100100000
AgR170058	2017	Bo	Karamea	West Coast		VNTR53	184.9MB	194.2MB	99.41%	101.7	19790	676573777777600	SB0130	6F-57-5F-7F-FF-60	1101111101011110111111111111111111111100000
AgR170080	2017	Bo	Westport	West Coast		VNTR138	182.9MB	206.7MB	99.53%	103.0	26130	676573777777600	SB0130	6F-57-5F-7F-FF-60	1101111101011110111111111111111111111100000
AgR170103	2017	Bo	Featherston	Wellington		VNTR21	173.5MB	182.7MB	99.51%	96.8	19102	676573777777600	SB0130	6F-57-5F-7F-FF-60	1101111101011110111111111111111111111100000
AgR170110	2017	Bo	Reefton	West Coast		VNTR35	150.3MB	175.0MB	99.51%	91.6	18857	676573777777600	SB0130	6F-57-5F-7F-FF-60	1101111101011110111111111111111111111100000
AgR170145	2017	Bo	Culverden	North Canterbury		VNTR59	198.4MB	210.0MB	99.40%	112.6	22869	676573777777600	SB0130	6F-57-5F-7F-FF-60	1101111101011110111111111111111111111100000
AgR170170	2017	Bo	Collingwood	Tasmin		VNTRnovel	182.6MB	192.2MB	99.49%	105.8	18767	676573777376200	N/A	6F-57-5F-7E-FE-20	1101111101011110111111111110111111100100000
AgR170171	2017	Bo	Collingwood	Tasmin		VNTRnovel	171.3MB	191.3MB	99.45%	96.7	22653	676573777376200	N/A	6F-57-5F-7E-FE-20	1101111101011110111111111110111111100100000
AgR170174	2017	Ce	Ahaura	West Coast		VNTR59	154.1MB	173.1MB	99.41%	96.7	16834	676573777777600	SB0130	6F-57-5F-7F-FF-60	1101111101011110111111111111111111111100000
AgR170181	2017	Bo	Karamea	West Coast		VNTR53	193.2MB	212.1MB	99.45%	99.6	21231	676573777777600	SB0130	6F-57-5F-7F-FF-60	1101111101011110111111111111111111111100000
AgR170184	2017	Ce	Ranfurly	Otago		VNTR28	186.3MB	209.3MB	99.56%	93.3	23147	664073777777600	SB0140	6D-3-5F-7F-FF-60	1101101000001110111111111111111111111100000
AgR170216	2017	Bo	Westport	West Coast		VNTR35	181.7MB	204.9MB	99.55%	93.4	20027	676573777777600	SB0130	6F-57-5F-7F-FF-60	1101111101011110111111111111111111111100000
AgR170265	2017	Bo	Karamea	West Coast		VNTR86	201.0MB	226.7MB	99.47%	104.8	24335	676573777777600	SB0130	6F-57-5F-7F-FF-60	1101111101011110111111111111111111111100000
AgR170271	2017	Bo	Outram	Otago		VNTR28	202.0MB	219.3MB	99.57%	105.6	22723	664073777777600	SB0140	6D-3-5F-7F-FF-60	1101101000001110111111111111111111111100000
AgR170275	2017	Bo	Westport	West Coast		VNTR35	223.1MB	244.5MB	99.59%	116.7	25308	676573777777600	SB0130	6F-57-5F-7F-FF-60	1101111101011110111111111111111111111100000
AgR170276	2017	Bo	Collingwood	Tasman		VNTR20	136.2MB	148.9MB	99.47%	70.1	9734	676573777376200	N/A	6F-57-5F-7E-FE-20	1101111101011110111111111110111111100100000
AgR170291	2017	Bo	Waitati	Otago		VNTR103	149.4MB	168.0MB	99.65%	77.1	13972	664073777777600	SB0140	6D-3-5F-7F-FF-60	1101101000001110111111111111111111111100000
AgR170307	2017	Bo	Outram	Otago		VNTR28	132.4MB	147.9MB	99.50%	78.4	14132	664073777777600	SB0140	6D-3-5F-7F-FF-60	1101101000001110111111111111111111111100000
AgR170308	2017	Bo	Greymouth	West Coast		VNTR59	193.1MB	211.4MB	99.44%	98.0	19404	676573777777600	SB0130	6F-57-5F-7F-FF-60	1101111101011110111111111111111111111100000
AgR170309	2017	Bo	Greymouth	West Coast		VNTR59	205.0MB	225.8MB	99.44%	107.7	23719	676573777777600	SB0130	6F-57-5F-7F-FF-60	1101111101011110111111111111111111111100000
AgR170349	2017	Bo	Westport	West Coast		VNTR53	187.2MB	208.6MB	99.45%	97.6	18809	676573777777600	SB0130	6F-57-5F-7F-FF-60	1101111101011110111111111111111111111100000
AgR170351	2017	Bo	Ranfurly	Otago		VNTR27	134.5MB	153.0MB	99.51%	80.6	15501	664073777777600	SB0140	6D-3-5F-7F-FF-60	1101101000001110111111111111111111111100000
AgR170368	2017	Bo	Westport	West Coast		VNTRnovel	142.0MB	146.0MB	99.41%	83.6	13834	676573777774600	N/A	6F-57-5F-7F-FC-60	1101111101011110111111111111111111001100000
AgR170369	2017	Bo	Karamea	West Coast		VNTR53	201.0MB	222.3MB	99.46%	107.4	23220	676573777777600	SB0130	6F-57-5F-7F-FF-60	1101111101011110111111111111111111111100000
AgR170386	2017	Bo	Patoka	Hawks Bay		VNTR2	145.7MB	158.6MB	99.73%	86.9	15059	664073777777600	SB0140	6D-3-5F-7F-FF-60	1101101000001110111111111111111111111100000
AgR170392	2017	Bo	Kaikouraoura	North Canterbury		VNTR20	141.1MB	160.9MB	99.46%	79.6	17246	676573777776200	SB1504	6F-57-5F-7F-FE-20	1101111101011110111111111111111111100100000
AgR170393	2017	Bo	Whataroa	West Coast		VNTR67	139.7MB	155.8MB	99.45%	85.1	13784	602573777777600	SB1446	60-57-5F-7F-FF-60	1100000101011110111111111111111111111100000
AgR170395	2017	Bo	Darfield	Canterbury		VNTR43	147.0MB	156.1MB	99.44%	87.6	15899	676573777777600	SB0130	6F-57-5F-7F-FF-60	1101111101011110111111111111111111111100000
AgR170397	2017	Bo	Runanga	West Coast		VNTR105	119.9MB	127.4MB	99.23%	70.9	10358	676573777777600	SB0130	6F-57-5F-7F-FF-60	1101111101011110111111111111111111111100000
AgR170417	2017	Bo	Westport	West Coast		VNTR138	143.0MB	160.6MB	99.49%	89.2	15021	676573777777600	SB0130	6F-57-5F-7F-FF-60	1101111101011110111111111111111111111100000
AgR170418	2017	Bo	Reefton	West Coast		VNTR35	152.9MB	175.6MB	99.49%	88.6	19468	676573777777600	SB0130	6F-57-5F-7F-FF-60	1101111101011110111111111111111111111100000
AgR170419	2017	Bo	Reefton	West Coast		VNTR35	186.9MB	204.4MB	99.53%	108.2	20757	676573777777600	SB0130	6F-57-5F-7F-FF-60	1101111101011110111111111111111111111100000
AgR170421	2017	Bo	Reefton	West Coast		VNTR35	131.9MB	145.8MB	99.50%	80.5	12320	676573777777600	SB0130	6F-57-5F-7F-FF-60	1101111101011110111111111111111111111100000
AgR170428	2017	Bo	Ranfurly	Otago		VNTR28	186.5MB	205.4MB	99.57%	105.6	21200	664073777777600	SB0140	6D-3-5F-7F-FF-60	1101101000001110111111111111111111111100000
AgR170432	2017	Bo	Kumara	West Coast		VNTR59	146.4MB	159.6MB	99.39%	89.7	15884	676573777777600	SB0130	6F-57-5F-7F-FF-60	1101111101011110111111111111111111111100000
AgR170437	2017	Bo	Greymouth	West Coast		VNTR59	196.0MB	227.5MB	99.42%	110.3	33267	676573777777600	SB0130	6F-57-5F-7F-FF-60	1101111101011110111111111111111111111100000
AgR170438	2017	Bo	CoalCreek	West Coast		VNTR59	166.6MB	190.4MB	99.43%	100.7	23372	676573777777600	SB0130	6F-57-5F-7F-FF-60	1101111101011110111111111111111111111100000
AgR170439	2017	Bo	Arahura	West Coast		VNTR59	174.3MB	193.7MB	99.44%	108.7	20295	676573777777600	SB0130	6F-57-5F-7F-FF-60	1101111101011110111111111111111111111100000
AgR170443	2017	Bo	Dobson	West Coast		VNTR35	165.8MB	183.3MB	99.53%	107.6	22999	676573777777600	SB0130	6F-57-5F-7F-FF-60	1101111101011110111111111111111111111100000
AgR170444	2017	Bo	Dobson	West Coast		VNTR35	151.0MB	165.5MB	99.52%	95.2	16754	676573777777600	SB0130	6F-57-5F-7F-FF-60	1101111101011110111111111111111111111100000
AgR170481	2017	Bo	Waitati	Otago		VNTR103	189.9MB	204.2MB	99.60%	112.2	21269	664073777777600	SB0140	6D-3-5F-7F-FF-60	1101101000001110111111111111111111111100000
AgR170512	2017	Bo	Kumara	West Coast		VNTR59	185.9MB	211.0MB	99.41%	108.2	23165	676573777777600	SB0130	6F-57-5F-7F-FF-60	1101111101011110111111111111111111111100000
AgR170598	2017	Bo	Karamea	West Coast		VNTR86	153.2MB	171.2MB	99.39%	97.8	19799	676573777777600	SB0130	6F-57-5F-7F-FF-60	1101111101011110111111111111111111111100000
AgR170603	2017	Bo	Dobson	West Coast		VNTR106	130.6MB	151.3MB	99.47%	78.0	15022	676503377777600	N/A	6F-54-1B-7F-FF-60	1101111101010000110111111111111111111100000
AgR170607	2017	Bo	Dobson	West Coast		VNTR35	159.1MB	176.1MB	99.53%	109.2	17884	676573777777600	SB0130	6F-57-5F-7F-FF-60	1101111101011110111111111111111111111100000
AgR170641	2017	Ce	Middlemarch	Otago		VNTR62	136.8MB	152.5MB	99.55%	85.2	12707	664073777777600	SB0140	6D-3-5F-7F-FF-60	1101101000001110111111111111111111111100000
AgR170664	2017	Bo	Waipawa	Hawks Bay		VNTR2	207.2MB	233.1MB	99.84%	125.5	30071	664073777777600	SB0140	6D-3-5F-7F-FF-60	1101101000001110111111111111111111111100000
AgR170692	2017	Ce	Luggate	Otago		VNTR24	130.4MB	144.6MB	99.49%	70.0	17773	664073777777600	SB0140	6D-3-5F-7F-FF-60	1101101000001110111111111111111111111100000
AgR170708	2017	Bo	Ranfurly	Otago		VNTR28	150.8MB	172.7MB	99.53%	81.6	28022	664073777777600	SB0140	6D-3-5F-7F-FF-60	1101101000001110111111111111111111111100000
AgR170754	2017	Bo	Westport	West Coast		VNTR53	134.3MB	164.0MB	99.38%	86.9	15451	676573777777600	SB0130	6F-57-5F-7F-FF-60	1101111101011110111111111111111111111100000
AgR180045	2018	Bo	Westport	West Coast		VNTR35	170.7MB	206.3MB	99.55%	111.2	21818	676573777777600	SB0130	6F-57-5F-7F-FF-60	1101111101011110111111111111111111111100000
AgR180049	2018	Bo	Runanga	West Coast		VNTR59	154.5MB	177.2MB	99.41%	98.1	18600	676573777777600	SB0130	6F-57-5F-7F-FF-60	1101111101011110111111111111111111111100000
AgR180057	2018	Bo	Greymouth	West Coast		VNTR59	159.7MB	167.9MB	99.40%	103.0	15666	676573777777600	SB0130	6F-57-5F-7F-FF-60	1101111101011110111111111111111111111100000
AgR180071	2018	Bo	Rakaia	Canterbury		VNTR53	271.6MB	303.1MB	99.40%	188.1	50971	676573777777600	SB0130	6F-57-5F-7F-FF-60	1101111101011110111111111111111111111100000
AgR180078	2018	Bo	Westport	West Coast		VNTR53	163.1MB	181.9MB	99.33%	108.0	18907	676573777777600	SB0130	6F-57-5F-7F-FF-60	1101111101011110111111111111111111111100000
AgR180086	2018	Bo	Westport	West Coast		VNTR35	150.8MB	173.1MB	99.51%	90.0	16980	676573777777600	SB0130	6F-57-5F-7F-FF-60	1101111101011110111111111111111111111100000
AgR200360	2002	Bo	Tapuni	Southland	REA93	VNTR17	182.0MB	195.2MB	99.71%	103.8	19404	674573777777600	SB1031	6F-17-5F-7F-FF-60	1101111001011110111111111111111111111100000
AgR1013613	2010	Bo	Whataroa	West Coast	REA16	VNTR41	195.1MB	213.7MB	99.54%	115.0	21729	676573777777600	SB0130	6F-57-5F-7F-FF-60	1101111101011110111111111111111111111100000
AgR1606613	2016	Fe	AdHoc	Southland		VNTR19	125.6MB	146.1MB	99.50%	82.4	12429	676573777776200	SB1504	6F-57-5F-7F-FE-20	1101111101011110111111111111111111100100000
AgR1606616	2016	Fe	AdHoc	Southland		VNTR19	143.8MB	171.3MB	99.49%	96.1	16605	676573777776200	SB1504	6F-57-5F-7F-FE-20	1101111101011110111111111111111111100100000
AgR1606931	2016	Bo	Waikato	Central North Island		VNTR139	162.7MB	180.0MB	99.74%	90.0	22973	664073777777600	SB0140	6D-3-5F-7F-FF-60	1101101000001110111111111111111111111100000
AgR1607381	2016	Bo	Waikato	Central North Island		VNTR139	168.8MB	183.5MB	99.74%	94.9	17602	664073777777600	SB0140	6D-3-5F-7F-FF-60	1101101000001110111111111111111111111100000
AgR1701282	2017	Ce	Ahaura	West Coast		VNTR35	170.1MB	181.6MB	99.56%	103.6	20554	676573777777600	SB0130	6F-57-5F-7F-FF-60	1101111101011110111111111111111111111100000
AgR1702291	2017	Pi	HokonuiPigSurvey	Southland		VNTR17	176.5MB	187.3MB	99.76%	90.5	15520	674573777777600	SB1031	6F-17-5F-7F-FF-60	1101111001011110111111111111111111111100000
AgR1702292	2017	Pi	HokonuiPigSurvey	Southland		VNTR17	118.3MB	134.2MB	99.59%	76.5	11118	674573777777600	SB1031	6F-17-5F-7F-FF-60	1101111001011110111111111111111111111100000
AgR1702421	2017	Fe	Otago	Otago		VNTR103	112.8MB	121.7MB	99.46%	68.1	8956	664073777777600	SB0140	6D-3-5F-7F-FF-60	1101101000001110111111111111111111111100000
AgR1702452	2017	Bo	CoalCreekGreymouth	West Coast		VNTR59	180.8MB	208.5MB	99.48%	92.2	20931	676573777777600	SB0130	6F-57-5F-7F-FF-60	1101111101011110111111111111111111111100000
AgR1702501	2017	Bo	Inangahua	West Coast		VNTR35	150.8MB	167.3MB	99.53%	80.2	12304	676573777777600	SB0130	6F-57-5F-7F-FF-60	1101111101011110111111111111111111111100000
AgR1703411	2017	Pi	Tihoi	Waikato		VNTR2	143.7MB	157.7MB	99.75%	91.9	17575	664073777777600	SB0140	6D-3-5F-7F-FF-60	1101101000001110111111111111111111111100000
AgR1704033	2017	Bo	Westport	West Coast		VNTR35	131.2MB	140.3MB	99.48%	79.1	12206	676573777777600	SB0130	6F-57-5F-7F-FF-60	1101111101011110111111111111111111111100000
AgR1704292	2017	Pi	Tihoi	Waikato		VNTR2	143.3MB	157.9MB	99.71%	82.6	14544	664073777777600	SB0140	6D-3-5F-7F-FF-60	1101101000001110111111111111111111111100000
AgR1704521	2017	Pi	Hauhungaroa	Central North Island		VNTR2	146.3MB	169.1MB	99.72%	84.7	17727	664073777777600	SB0140	6D-3-5F-7F-FF-60	1101101000001110111111111111111111111100000
AgR1704532	2017	Pi	Hauhungaroa	Central North Island		VNTR2	144.7MB	168.0MB	99.72%	81.4	22210	664073777777600	SB0140	6D-3-5F-7F-FF-60	1101101000001110111111111111111111111100000
AgR1704651	2017	Fe	Shannon	Otago		VNTR62	119.6MB	153.5MB	99.48%	79.5	20007	664073777777600	SB0140	6D-3-5F-7F-FF-60	1101101000001110111111111111111111111100000
AgR1704894	2017	Fe	EasternRockandPillar	Otago		VNTR28	145.3MB	172.8MB	99.51%	98.8	18701	664073777777600	SB0140	6D-3-5F-7F-FF-60	1101101000001110111111111111111111111100000
AgR1705403	2017	Pi	StrathTaieri	Otago		VNTR28	132.0MB	158.7MB	99.49%	88.9	15970	664073777777600	SB0140	6D-3-5F-7F-FF-60	1101101000001110111111111111111111111100000
AgR1705404	2017	Pi	StrathTaieri	Otago		VNTR28	136.3MB	152.3MB	99.52%	91.4	15212	664073777777600	SB0140	6D-3-5F-7F-FF-60	1101101000001110111111111111111111111100000
AgR1705405	2017	Pi	StrathTaieri	Otago		VNTR28	145.4MB	185.3MB	99.54%	93.4	33634	664073777777600	SB0140	6D-3-5F-7F-FF-60	1101101000001110111111111111111111111100000
AgR1705461	2017	Pi	StrathTaieri	Otago		VNTR28	163.1MB	184.4MB	99.59%	112.7	19662	664073774377600	SB1787	6D-3-5F-78-FF-60	1101101000001110111111111000111111111100000
AgR1707022	2017	Pi	AdHoc	Otago			140.5MB	170.6MB	99.53%	94.0	15888	664073777777600	SB0140	6D-3-5F-7F-FF-60	1101101000001110111111111111111111111100000
AgR1707701	2017	Bo	Oamaru	Otago		VNTR28	120.1MB	135.8MB	99.52%	80.9	10473	664073777777600	SB0140	6D-3-5F-7F-FF-60	1101101000001110111111111111111111111100000
AgR1800156	2018	Pi	WesternMountains	Tasman		VNTR22	153.9MB	186.0MB	99.50%	107.3	18012	676573777777600	SB0130	6F-57-5F-7F-FF-60	1101111101011110111111111111111111111100000
AgR4202630	2004	Pi	Hauhungaroa	Central North Island			174.4MB	194.8MB	99.80%	105.6	21992	664073777777600	SB0140	6D-3-5F-7F-FF-60	1101101000001110111111111111111111111100000
AgR4202636	2004	Pi	Hauhungaroa	Central North Island			149.9MB	168.9MB	99.75%	86.9	17727	664073777777600	SB0140	6D-3-5F-7F-FF-60	1101101000001110111111111111111111111100000
AgR9410198	1994	Ce	Okarito	West Coast	REA19		182.7MB	201.3MB	99.52%	107.9	19008	676573777777600	SB0130	6F-57-5F-7F-FF-60	1101111101011110111111111111111111111100000
AgR17026616	2017	Fe	Wairau	MARL			152.1MB	170.0MB	99.48%	85.9	18496	676573777776200	SB1504	6F-57-5F-7F-FE-20	1101111101011110111111111111111111100100000
AgR17026628	2017	Fe	Wairau	MARL			135.6MB	155.3MB	99.42%	77.4	16120	676573777776200	SB1504	6F-57-5F-7F-FE-20	1101111101011110111111111111111111100100000
AgR17048911	2017	Fe	EasternRockandPillar	Otago		VNTR28	119.2MB	133.5MB	99.47%	81.0	11361	664073777777600	SB0140	6D-3-5F-7F-FF-60	1101101000001110111111111111111111111100000
AgR17048914	2017	Fe	EasternRockandPillar	Otago		VNTR28	116.3MB	138.7MB	99.43%	76.6	13135	664073777777600	SB0140	6D-3-5F-7F-FF-60	1101101000001110111111111111111111111100000
AgR17048918	2017	Fe	EasternRockandPillar	Otago		VNTR28	163.0MB	198.9MB	99.58%	112.0	25218	664073777777600	SB0140	6D-3-5F-7F-FF-60	1101101000001110111111111111111111111100000
AgR17048919	2017	Fe	EasternRockandPillar	Otago		VNTR62	136.8MB	160.0MB	99.52%	93.3	15888	664073777777600	SB0140	6D-3-5F-7F-FF-60	1101101000001110111111111111111111111100000
AgR17048922	2017	Fe	EasternRockandPillar	Otago		VNTR28	167.4MB	186.0MB	99.59%	116.2	22450	664073777777600	SB0140	6D-3-5F-7F-FF-60	1101101000001110111111111111111111111100000
AgR17053122	2017	Fe	Moonlight	Otago		VNTR62	128.9MB	152.7MB	99.51%	85.0	13874	664073777777600	SB0140	6D-3-5F-7F-FF-60	1101101000001110111111111111111111111100000
AgR17053156	2017	Fe	Moonlight	Otago		VNTR28	136.4MB	144.2MB	99.53%	88.1	13873	664073777777600	SB0140	6D-3-5F-7F-FF-60	1101101000001110111111111111111111111100000
